# Supplementary material
Source: publisher figshare collection journal article supplement (https://gsajournals.figshare.com/ndownloader/files/24184952)
Supplement: Supplementary file 1 [file 24184952]

## Sheet: SupplementalFile1_Zscores
AZC Chemical-Genetic Screen Results
Berg et al. 2020
Strains were grown on either SD of SD + 30 ug/mL AZC plates
Images after 5 days of growth were analyzed with SGATools
Systematic Name	Average Colony Size on SD	Average Colony Size on SD + AZC	Fitness	Z-Score
YNR041C	1384	60	0.0433526	-4.56215
YDR375C	1619.5	150	0.0966922	-3.96025
YBR171W	1906.75	354.75	0.188683	-3.91822
YOR065W	1301	215	0.165257	-3.74283
YLR131C	2198.25	392.5	0.180947	-3.6498
YOR358W	1816.5	354	0.19489	-3.46676
YFR010W	1489	182	0.12223	-3.34436
YPL060W	1733.25	376	0.217833	-3.26979
YMR116C	2206.25	637.25	0.289211	-3.11698
YBL021C	1565.25	443.25	0.285661	-3.06721
YNL215W	1989.75	687.25	0.34127	-2.99478
YLL039C	1862	353	0.190045	-2.941
YLL009C	1664.5	327.75	0.197308	-2.88472
YML129C	1832	444.5	0.246904	-2.87877
YLL044W	1751	367	0.209595	-2.78953
YDR074W	1507	377	0.250166	-2.75955
YJL121C	1685.5	463.5	0.274725	-2.7145
YIL097W	1373.33	381	0.278352	-2.68565
YOL109W	1992.75	591.25	0.296763	-2.66361
YGL237C	1883	606	0.312343	-2.65453
YMR294W	1945	755	0.389021	-2.6425
YKL048C	1526.33	195	0.127388	-2.64119
YOL064C	1800.25	541	0.300626	-2.63191
YJL062W	2652.5	773.25	0.288668	-2.60356
YLL006W	2143.25	501	0.235241	-2.59081
YIL043C	1993.75	752.25	0.377599	-2.58895
YKR035W-A	2415.5	569.25	0.236197	-2.58341
YFL023W	2198	491.25	0.223676	-2.57224
YCR019W	2039	426	0.209587	-2.56938
YDR103W	1959	541	0.276161	-2.55617
YGL019W	2157.5	715.25	0.331734	-2.54004
YNL298W	1484	602	0.406008	-2.51718
YHL033C	1468.5	570	0.392607	-2.47741
YNR006W	1318	543	0.411988	-2.47306
YPL180W	1741.5	540.75	0.31112	-2.46892
YDL104C	1688.25	384.5	0.227896	-2.46079
YBR289W	2010.5	452.25	0.228697	-2.45605
YGL173C	1290	446.5	0.34613	-2.45504
YCR028C-A	1564	359.5	0.229804	-2.44948
YHR129C	2050.38	514.75	0.245853	-2.44828
YIL141W	2649.25	817.25	0.309663	-2.43651
YIL054W	1972.5	782.75	0.40177	-2.4093
YIR006C	1422	40	0.0281294	-2.40925
YOL123W	1278	37	0.0289515	-2.40626
YNL268W	1535	671	0.42167	-2.40163
YIL055C	1701.75	676.75	0.403903	-2.39345
YDR162C	1857.83	473.208	0.24275	-2.39159
YHR133C	2059.5	832.25	0.405747	-2.37975
YLR038C	1615.5	607.5	0.375861	-2.37477
YIL106W	1330.5	50	0.0382772	-2.3723
YGL244W	1926	694	0.360332	-2.37119
YEL062W	2081.5	521.75	0.250428	-2.36863
YGL167C	2230.33	809.667	0.362511	-2.35833
YFR052W	2020.25	293.75	0.145316	-2.34438
YNL258C	1624	237.75	0.146704	-2.33663
YIL094C	1590	498	0.313208	-2.33043
YDR234W	2147	659	0.30694	-2.31537
YPL144W	1992.75	665	0.33005	-2.3064
YMR023C	1378	561	0.407112	-2.30117
YLR021W	1609.5	623.25	0.387286	-2.30003
YIL047C	2400.25	996.75	0.416782	-2.29774
YDR266C	2802	868	0.309229	-2.29747
YMR315W	2216	982.75	0.441658	-2.25418
YGR078C	1810.75	680.25	0.380355	-2.25297
YMR316W	2106.75	932	0.442923	-2.24484
YML111W	2213.75	731.75	0.326399	-2.22133
YNL322C	1959.75	872.25	0.446143	-2.22109
YMR299C	2207	986.5	0.446796	-2.21627
YPL225W	2407.75	820	0.341337	-2.2095
YLR393W	1743	698	0.402583	-2.19997
YEL053C	2114.25	579.75	0.274559	-2.18497
YER019W	2476.75	682	0.275391	-2.17864
YDL062W	1532.33	422	0.276521	-2.17243
YBR200W	2125.62	737.25	0.33583	-2.16813
YPR051W	2176.75	730	0.335396	-2.14693
YCR009C	2435.25	688.25	0.283034	-2.1338
YML033W	1507	650.75	0.431431	-2.1329
YJL044C	2409	841.75	0.34932	-2.12095
YFR011C	1602.75	455.5	0.283599	-2.11617
YPR050C	2270.75	768.25	0.339363	-2.11412
YHR150W	2266.25	1008.5	0.446821	-2.07449
YNL072W	1804	844	0.467849	-2.06095
YNL052W	1785.5	835.75	0.468045	-2.0595
YOR061W	2178.25	805.75	0.371227	-2.05251
YIL038C	2280	1027	0.450669	-2.04589
YJL218W	1924.25	688	0.359015	-2.04382
YOL129W	2556	955	0.372581	-2.0414
YLR338W	1775.5	764.5	0.428895	-2.02785
YKL148C	1739	536	0.308453	-2.02357
YOR236W	1459	197	0.135047	-2.01993
YCR026C	2185.75	660	0.302252	-2.01983
YML090W	1260	565	0.448413	-2.0154
YMR202W	2024	910	0.449971	-2.00461
YHL025W	1691.25	771	0.456802	-2.00031
YKR035C	1999.5	624.5	0.311981	-1.99624
YBR084W	1958.5	797	0.408287	-1.99113
YJL029C	1536.75	549.25	0.355129	-1.98374
YHR118C	2444.5	255.75	0.100054	-1.98071
YDR388W	2794.75	979.5	0.350602	-1.97379
YIL042C	2139.75	984.25	0.460928	-1.96965
YPL018W	2336.5	868.5	0.371861	-1.94744
YER120W	1779.33	541.667	0.306713	-1.94025
YDR247W	2680.25	952.75	0.354956	-1.93972
YGR194C	1907.5	890	0.465245	-1.93757
YGR135W	1854.21	612.5	0.328172	-1.93363
YDR532C	1563	481	0.307742	-1.93242
YGL127C	1866.25	805	0.435808	-1.92556
YOL004W	1521	588.25	0.387151	-1.92183
YKL213C	1902.12	564.875	0.27102	-1.91726
YKL167C	1564	499	0.322852	-1.91201
YNL211C	2230	1089	0.488372	-1.90955
YBL079W	1661.67	735	0.417852	-1.9072
YOR194C	1372	228	0.166181	-1.90656
YBR170C	3035	1257	0.418211	-1.90405
YER003C	1619.67	270	0.167031	-1.90347
YPR076W	2139.25	780.25	0.364915	-1.9028
YOR039W	2097.75	818.25	0.389684	-1.90104
YER153C	1679.25	523.75	0.31271	-1.8946
YMR080C	1952.5	912	0.467578	-1.88278
YDR255C	2279.75	820.75	0.362461	-1.88101
YCR060W	1697.5	556.5	0.32592	-1.87947
YFL025C	2192.75	686.75	0.314804	-1.87866
YDR539W	1549.5	501.5	0.3149	-1.87794
YOL095C	1911	762	0.395894	-1.85008
YBR010W	1403.5	611.5	0.424435	-1.84943
YBR267W	1791.75	595	0.331804	-1.84457
YBL042C	1389	591	0.425486	-1.84021
YLR056W	1805.29	654.958	0.359029	-1.83831
YMR060C	1590	760.5	0.474328	-1.83608
YML034W	1763.75	834.25	0.474378	-1.83573
YMR002W	2211.75	1051	0.474682	-1.83363
YML004C	2253.75	1070.5	0.475211	-1.82997
YOL115W	2106	840	0.39886	-1.82574
YJR074W	2240	716.875	0.315802	-1.82248
YLL036C	1436	204.667	0.142832	-1.80749
YLR114C	1858.5	862	0.462692	-1.80677
YJR082C	2386.5	929.75	0.389466	-1.80151
YLR199C	1770.75	819.5	0.463599	-1.80083
YFR050C	1791.5	436.25	0.243677	-1.79478
YMR010W	2110.5	1013	0.48065	-1.79233
YMR003W	2260.25	1087	0.480924	-1.79044
YPL133C	2351.75	918.75	0.390529	-1.78718
YKL024C	1875.5	456.75	0.245562	-1.78425
YKL101W	2450.25	832.5	0.339509	-1.78295
YML012C-A	1560.5	750.5	0.482011	-1.78292
YLR218C	1274	497.5	0.390756	-1.77692
YDR393W	2384.25	890	0.375996	-1.77511
YHL026C	2162.5	1053.75	0.487209	-1.77433
YMR056C	2108	1021	0.484433	-1.76616
YKR024C	2046.5	696.5	0.341894	-1.76447
YOR058C	2136	867.5	0.406394	-1.76391
YEL061C	2523.25	832.5	0.330022	-1.76284
YOR181W	1661.33	398.056	0.217507	-1.75322
YJL175W	2359	930.75	0.396199	-1.74794
YAR003W	1398.75	604.5	0.436214	-1.74607
YPR092W	1360	528.5	0.384263	-1.74279
YKL137W	2329	801.5	0.345223	-1.73868
YEL003W	2018	663	0.333556	-1.73594
YCL039W	1663.75	574.75	0.350953	-1.73101
YDR455C	2403.25	804.75	0.334558	-1.72832
YDL066W	2266.75	797.75	0.351727	-1.72642
YAL045C	2128.5	934.5	0.439232	-1.71958
YDL052C	1790.5	627.25	0.352936	-1.71925
YPL140C	2678.75	1070	0.398852	-1.71572
YHL008C	1954	966.75	0.496171	-1.70772
YLR048W	2029.25	975	0.478007	-1.70658
YAL031C	2048.25	909.25	0.441643	-1.69843
YKL165C	1417	317.5	0.223835	-1.69663
YOR141C	2041.5	848	0.414603	-1.69654
YIL062C	1394	239	0.171449	-1.69161
YHR131C	1927.25	962	0.498346	-1.69156
YOR067C	1803.25	747	0.415445	-1.68963
YLR242C	1661.75	807.25	0.480821	-1.68817
YDL193W	2267	392.25	0.172574	-1.68705
YOR371C	2101	844	0.402254	-1.68652
YBR014C	1799.33	799.667	0.443281	-1.68405
YGL010W	2029.75	971	0.477042	-1.68211
YML050W	2051.5	803.75	0.391781	-1.68062
YCR063W	1720	619	0.359902	-1.67794
YML010C-B	1630.75	783	0.497309	-1.67707
YPL145C	2046.25	822.5	0.403404	-1.67664
YMR214W	2285.5	1134	0.497497	-1.67576
YOR336W	1690.5	442	0.2653	-1.67396
YCL027W	1698.75	625	0.360642	-1.67355
YOL067C	1297	541.5	0.417633	-1.67168
YGL073W	1820.75	420.75	0.231153	-1.66998
YKL018W	1551.33	363	0.231404	-1.66906
YGL263W	2178.75	1043.25	0.47967	-1.6666
YOR125C	1389.33	544.667	0.39397	-1.66252
YGL248W	1639.75	789.25	0.480843	-1.65967
YCR006C	2375.75	869.5	0.363313	-1.65772
YOL038W	1881.5	504.75	0.268446	-1.65638
YPL017C	2749.25	1117.25	0.406048	-1.65395
YCR081W	1624	590.25	0.364041	-1.6534
YHR078W	2146.25	1077.75	0.503539	-1.65297
YJL150W	2403	982.25	0.409011	-1.646
YDR276C	1602.96	614.417	0.368703	-1.64362
YDR131C	2752.75	1078.75	0.393229	-1.64029
YIL030C	2009.75	1015.25	0.505268	-1.64012
YBL064C	2076.75	928	0.448552	-1.63779
YJL057C	2653	1092	0.411719	-1.62445
YGL149W	2406.75	1167.75	0.48688	-1.62403
YLR237W	1712.75	829.5	0.491498	-1.61833
YJL188C	2406.5	991.75	0.412519	-1.61808
YKL055C	1578.33	568.333	0.360943	-1.61688
YOR062C	2229.5	945.75	0.424524	-1.61513
YDL033C	1400.12	503.875	0.356466	-1.6089
YLR185W	1620.33	791.333	0.493058	-1.60813
YER092W	2526.38	691.375	0.274443	-1.60784
YDR054C	2044.62	474.5	0.23344	-1.60767
YOR292C	2418.75	996	0.411649	-1.60586
YGL252C	1424	684.5	0.490641	-1.60182
YIL112W	1996.25	822.75	0.414896	-1.59917
YGR217W	1966.5	1007.25	0.511846	-1.59123
YBR105C	2271.25	1028.5	0.453875	-1.59108
YKL109W	2028.5	737.75	0.36435	-1.59049
YOL016C	2325.5	996.75	0.427579	-1.59005
YML035C-A	1870.25	962.25	0.510069	-1.58877
YOR360C	2224.5	926.5	0.415398	-1.57368
YHL037C	2083	1071.5	0.514321	-1.57284
YDL007W	1283	258	0.200562	-1.57238
YLR164W	1950.5	969.25	0.498754	-1.57086
YIL139C	2386.25	1001.25	0.418731	-1.56866
YFR004W	1834.88	435.5	0.232707	-1.56494
YKL139W	2609	961	0.367673	-1.56474
YDR196C	2013.75	403.5	0.20436	-1.55834
YIL023C	2108	1090	0.516819	-1.55427
YOR280C	2296	960	0.418367	-1.54819
YML010W	1417	376	0.265349	-1.54546
YBR027C	1937.5	887	0.459157	-1.54474
YGR253C	1917.75	400	0.208547	-1.54425
YHR075C	2084	1080	0.518234	-1.54375
YNL282W	1496.25	313.75	0.210083	-1.53884
YOR172W	2427.75	1052.75	0.433903	-1.53815
YGL236C	1986.75	998	0.501539	-1.53747
YLR239C	1556.33	785.667	0.504467	-1.53349
YNL090W	1987.25	1069.5	0.539602	-1.5316
YOL008W	2028.75	882.75	0.434888	-1.53008
YGR012W	2392.75	1204.25	0.502859	-1.52968
YOR335C	1300	277	0.213077	-1.52829
YPL115C	2454	1029.5	0.420754	-1.52769
YGL235W	1886.5	946.75	0.503458	-1.52615
YKL006W	2342.25	876.25	0.372836	-1.52474
YML123C	2007.25	1021.25	0.519327	-1.52471
YLR079W	1527	782.75	0.506367	-1.52106
YML097C	1477.67	769.333	0.519931	-1.52053
YNL080C	2173.75	1200	0.541622	-1.5167
YDL201W	1996.5	820.5	0.409094	-1.51617
YDR126W	2294.17	766.25	0.301987	-1.51336
YGL048C	1531.5	409.5	0.274276	-1.51295
YDL232W	2352.5	963	0.409523	-1.51281
YNL076W	1328	720	0.542169	-1.51267
YGR014W	2403.75	1217.25	0.506532	-1.50799
YDL177C	2146.5	833.75	0.389601	-1.50181
YDL215C	2335.5	959	0.41101	-1.50118
YJR079W	2520.5	1077.75	0.428076	-1.4943
YOR259C	1884.88	542.125	0.284885	-1.4931
YJL142C	2436.5	1043.75	0.428535	-1.49064
YHR044C	1861.25	977.75	0.525661	-1.48856
YDR477W	1557.25	650.25	0.415894	-1.48121
YGR116W	1981.75	432	0.223904	-1.4792
YKL041W	2183	827	0.378836	-1.47824
YMR177W	1988.67	1045.67	0.526131	-1.47763
YLR169W	2170	1112.75	0.51306	-1.47728
YGR178C	2585.5	1363	0.527252	-1.47673
YOR334W	1942.75	823.25	0.426957	-1.47445
YNL235C	2173.25	1175.5	0.547373	-1.47428
YNL201C	2240.5	1229.25	0.547526	-1.47315
YFL032W	2506.25	921.75	0.368096	-1.47306
YJL099W	2491.75	1078.25	0.431319	-1.46849
YLR233C	1870.75	964	0.514571	-1.4674
YIL128W	2410.25	1042	0.431572	-1.46648
YGL154C	2187	1126.5	0.513601	-1.46626
YBR041W	1778.25	833.25	0.468518	-1.46259
YDL053C	2083.5	825.75	0.396526	-1.46074
YMR175W	2112.25	1117.75	0.528847	-1.45884
YCL038C	1932.25	780	0.397659	-1.45403
YNL311C	2380.5	1310.25	0.550325	-1.45249
YLR047C	2031.5	1051.5	0.517339	-1.44929
YDR002W	2266.75	694.75	0.30559	-1.44884
YBR272C	2167.5	865.5	0.398843	-1.44701
YBR069C	1803.25	834.25	0.470437	-1.44575
YMR207C	2162	1150.75	0.530739	-1.44575
YHL035C	2115.75	1122	0.531503	-1.44514
YKL127W	2720	1041.25	0.383236	-1.44416
YFL009W	1925.88	513.875	0.263679	-1.44229
YDR486C	1608.5	609	0.37219	-1.4419
YPL074W	2453	1058.5	0.43093	-1.44034
YOL019W	2142.25	955.25	0.446073	-1.43828
YGR263C	1698.25	909	0.532564	-1.43726
YJR005W	2344.5	1020.75	0.43538	-1.43618
YJR065C	1696.53	418.583	0.262519	-1.43527
YNL169C	1287.67	711.333	0.552899	-1.4335
YER023W	1784.75	527.5	0.296378	-1.43247
YNL081C	2468	1366	0.553485	-1.42919
YBR178W	2234.75	1058.75	0.473398	-1.41976
YBR058C	2223.75	1054.25	0.473528	-1.41862
YGL218W	1534	877.667	0.522111	-1.41601
YIL041W	2569.5	1376.75	0.535497	-1.41546
YIL135C	2272.5	974	0.43799	-1.41542
YLR173W	2285.5	1194.75	0.522518	-1.41541
YOR068C	1822.5	836.75	0.449084	-1.41357
YPR061C	2498.5	1058.5	0.424263	-1.41199
YOL055C	1890.75	847.75	0.449675	-1.40872
YIR042C	2566.75	1126.5	0.438863	-1.40847
YOR044W	2070.25	931.75	0.449808	-1.40763
YGR242W	2166	1163.5	0.536797	-1.4058
YBR221C	1375.5	549.167	0.400665	-1.40513
YKL027W	2921	1128	0.388952	-1.39987
YIL052C	2119	1137	0.537709	-1.39901
YHR034C	1629.75	581.875	0.376543	-1.39805
YHR018C	2402.75	1294.25	0.53828	-1.39477
YBR095C	1810.62	818.625	0.45232	-1.38896
YPL136W	2046.75	883.25	0.437326	-1.38542
YLR287C	1892.75	994.5	0.527396	-1.3835
YLL011W	1763	451	0.254545	-1.38221
YLR285W	2161.5	1139.75	0.527808	-1.38081
YFL033C	2817.25	1204	0.428165	-1.37973
YOR288C	2503.5	1097.5	0.438995	-1.37109
YML031W	2037.75	652	0.319789	-1.3695
YGL234W	2260	1198	0.530088	-1.36891
YGL161C	2346.5	1241.5	0.530139	-1.36861
YHR094C	2052.5	1113.5	0.541922	-1.36771
YOR301W	2500.75	1099	0.439391	-1.3677
YNL263C	1728.33	426.667	0.251924	-1.36574
YNR015W	1596.25	895.5	0.562188	-1.36498
YOL131W	2253.75	1025.5	0.455273	-1.36278
YCR098C	2170	897	0.41309	-1.36251
YKL147C	2689.25	1058	0.394019	-1.36061
YBR160W	1955.92	582.833	0.297868	-1.35756
YNL296W	1455.25	809.25	0.563252	-1.35712
YJL051W	2663	1184.75	0.445423	-1.35627
YMR115W	2349.25	1273.5	0.543862	-1.35495
YOR349W	2535.75	1122.25	0.44088	-1.35491
YDL097C	1448	382.2	0.262562	-1.35396
YMR168C	1493.5	397	0.262908	-1.35274
YJL022W	2509	1117.75	0.445866	-1.35274
YGR025W	2539.5	1349	0.533518	-1.34867
YDR258C	2583.75	1111.75	0.430598	-1.34793
YBL082C	1974.5	947.25	0.481599	-1.3478
YGR239C	2324	1263.75	0.544744	-1.34673
YHR082C	2392.5	1303	0.544841	-1.34601
YLR423C	2061	1123.75	0.54524	-1.34541
YDR389W	2607.25	1124.75	0.43099	-1.34487
YJR120W	1725	687	0.396055	-1.34483
YHR027C	1412.33	365	0.258053	-1.34092
YDR043C	2367.25	1026.25	0.432919	-1.3404
YMR283C	2010.5	1136	0.565799	-1.33833
YLR057W	2086.75	1115	0.534462	-1.33728
YLL062C	1907.5	1021.25	0.53497	-1.33396
YDR510W	1687.5	536.5	0.323781	-1.33269
YPL108W	2498.25	1107.75	0.443686	-1.33082
YLR028C	2012.5	1076.5	0.535654	-1.32948
YIL155C	1954.5	843.5	0.44894	-1.32829
YDR150W	2150.12	832.125	0.393976	-1.32813
YLL049W	1609	855.25	0.536283	-1.32537
YMR009W	2076.75	1134.5	0.548194	-1.32497
YBR118W	2153.5	838.625	0.38992	-1.32458
YOL118C	2573.75	1188	0.460176	-1.32254
YML105C	2169.5	711.25	0.328625	-1.32012
YHR107C	1666.71	436.286	0.272818	-1.31783
YBR103W	1449.5	704	0.485116	-1.31694
YDR071C	1711.25	767.25	0.434606	-1.31658
YPL252C	1852.5	504.75	0.273762	-1.31451
YMR085W	2019	1104.5	0.549744	-1.31424
YDR185C	2097.75	914.25	0.435404	-1.31034
YLR004C	1811	975.75	0.53864	-1.30995
YOR037W	1992.25	920.75	0.461773	-1.30944
YDR409W	2419.5	1053.5	0.43569	-1.3081
YNL338W	2033.5	1157.75	0.569954	-1.30769
YIR008C	1622.75	543.25	0.330943	-1.30661
YOR070C	2044.75	889.125	0.43517	-1.30492
YHR021W-A	2076.5	1145.75	0.550541	-1.30365
YLR402W	1733.75	938.75	0.539693	-1.30306
YOL050C	1656.25	768.25	0.462614	-1.30254
YKR066C	2250.25	902.5	0.401522	-1.30248
YPL269W	2264.25	992.75	0.437566	-1.30197
YOL111C	2118.5	980.75	0.462826	-1.30079
YNL234W	2286.25	1302.75	0.570935	-1.30045
YBR195C	1769.12	670.125	0.369634	-1.29945
YDL147W	1805.5	550.25	0.30532	-1.29917
YPL227C	2488.5	1114.25	0.447428	-1.2987
YER090W	1892	740	0.391121	-1.29782
YGL160W	2353.25	1276.25	0.542247	-1.29713
YMR135C	2036.25	1105.75	0.552392	-1.29592
YOR384W	2249.25	1006.25	0.448013	-1.29367
YLR087C	1870.5	947	0.497798	-1.29295
YKR048C	2058.75	828.25	0.402757	-1.29291
YGL077C	1954.5	1060.5	0.543036	-1.29247
YOR245C	2393.25	1079.5	0.448193	-1.29213
YJL019W	1719.88	472	0.291885	-1.29063
YJR077C	2361.5	1068	0.453707	-1.29035
YDL142C	2413.5	1034.75	0.425518	-1.28881
YBR194W	1747	824.25	0.488385	-1.28825
YGL136C	1449	788	0.543823	-1.28782
YJL154C	2476.75	1126.25	0.454078	-1.2874
YGL168W	1849.5	1083.5	0.543956	-1.28704
YOR297C	2009.75	901	0.449005	-1.28516
YGR290W	2117	1170.25	0.5536	-1.28092
YGL066W	1666.33	681.167	0.422944	-1.27777
YPL052W	1973	888.5	0.449975	-1.27683
YCR030C	2588.25	1109.25	0.428146	-1.27323
YGL257C	2390.75	1304.25	0.546347	-1.27292
YKR018C	2511.75	1017.5	0.405575	-1.27107
YMR099C	2171.5	1212.5	0.555993	-1.271
YDR024W	2720	1194.25	0.440616	-1.26956
YLR435W	1874.5	1041.25	0.556508	-1.26744
YER077C	2386.75	943.25	0.395249	-1.2664
YPL021W	2368.5	1067.75	0.451273	-1.26569
YCR017C	2422.5	1049	0.429585	-1.26469
YJR024C	2432.25	1110.5	0.456968	-1.26441
YGR223C	1980	1180.5	0.555991	-1.26315
YLR425W	1814.75	1011	0.557227	-1.26246
YNL132W	2148.75	724.75	0.339033	-1.26197
YFR008W	1578.5	637	0.395919	-1.2613
YDR133C	2260.5	1000.25	0.441811	-1.26021
YLR292C	1850.75	1006.25	0.546253	-1.26015
YBR292C	2425.75	1044.5	0.430428	-1.25969
YJL170C	2761	1260.25	0.457873	-1.25721
YOR243C	2294.75	1038.5	0.452308	-1.2568
YGR106C	2254.75	1238.75	0.549078	-1.25679
YDR149C	2657	1185.75	0.442295	-1.25642
YOR355W	2167.5	981.25	0.452423	-1.25581
YCR062W	1935.75	840.25	0.431212	-1.25504
YOR045W	1961.25	916.75	0.468564	-1.2537
YDL006W	1840.75	804	0.431746	-1.25187
YKR027W	2512	1024.75	0.408106	-1.25146
YIR017C	2799.25	1286	0.459204	-1.24662
YPR079W	1823.75	816	0.444319	-1.24613
YJR050W	2548.25	1174.25	0.459307	-1.24579
YOR153W	1991.25	933.75	0.469575	-1.24541
YOR152C	1954.25	917	0.469692	-1.24445
YLR178C	2092.5	1142.5	0.549106	-1.24149
YIL107C	2459.33	1129.67	0.460072	-1.23971
YOL036W	1884.67	871.667	0.470278	-1.23964
YOR014W	2145	820.375	0.393426	-1.2376
YDL137W	2092.75	906.75	0.434405	-1.23611
YLR254C	1433.75	782.5	0.549964	-1.23588
YER118C	2574.25	1027	0.39953	-1.23381
YMR269W	1855	1075.25	0.580011	-1.23349
YDR084C	2732.25	1213	0.445379	-1.2323
YLR241W	1854.5	1019.5	0.550609	-1.23165
YLR390W	2044	1125.75	0.550722	-1.23092
YDL023C	2401.75	1045.5	0.435287	-1.23088
YOR285W	2347.5	1067.75	0.455498	-1.22941
YOL139C	2074.5	732.5	0.352196	-1.22922
YKL033W-A	2565.25	1055.5	0.411	-1.22904
YCR034W	1801.75	776.25	0.435753	-1.22812
YLR043C	1926.5	1058.25	0.551577	-1.22532
YKR036C	2497.75	1033.5	0.411612	-1.2243
YBR123C	1555	469.333	0.29962	-1.22341
YLL041C	1796.25	716.75	0.411848	-1.22247
YDR326C	2190.5	979.75	0.447238	-1.22199
YLR172C	2205.5	1213.25	0.552235	-1.22102
YBR122C	1716.33	863.667	0.496198	-1.21969
YJL126W	2619.75	1215.5	0.462598	-1.21961
YNL203C	1886.25	1095.5	0.581944	-1.21923
YHR083W	1715	497.5	0.288335	-1.2183
YGR138C	1985.5	1099.75	0.555608	-1.21824
YER007C-A	2383.75	956.25	0.401586	-1.21816
YKL132C	2781	1147.75	0.412695	-1.21591
YPR057W	2147.25	959	0.448129	-1.21462
YMR109W	1795.33	1013.67	0.564278	-1.21368
YAL017W	1877.75	934.5	0.496984	-1.21279
YPL112C	2179	995.5	0.45748	-1.2124
YPL213W	2050.25	932.25	0.457624	-1.21117
YPR153W	2457.5	1099.25	0.44866	-1.21023
YGL159W	2390.75	1330.5	0.557277	-1.20838
YKR054C	2278.75	942	0.413685	-1.20824
YNL202W	2045	1191.25	0.583523	-1.20758
YDR049W	1633.42	592.167	0.357622	-1.20595
YLR149C	2365.25	1305.75	0.554572	-1.20573
YML030W	1311	741.5	0.565617	-1.20441
YDR312W	2424.75	1089.25	0.449128	-1.20296
YOL116W	2165.5	1028.25	0.474799	-1.20254
YDR288W	2058.75	522.312	0.327885	-1.20138
YBR165W	2324.5	1101.12	0.474745	-1.20003
YJL098W	1973.5	906	0.46507	-1.19994
YKR033C	2519	1045	0.414759	-1.19992
YDR525W-A	1761.5	710	0.404006	-1.19975
YJR075W	2555.75	1192.5	0.465096	-1.19973
YPL249C	2173.5	984.25	0.459141	-1.19814
YLR258W	2048.75	1139	0.55575	-1.19802
YPL222W	2542.25	1167.75	0.459277	-1.19697
YEL071W	2527.75	1023.75	0.404824	-1.19352
YOR235W	2453.75	1110.5	0.459811	-1.19239
YNL233W	2023.25	1185.25	0.585716	-1.1914
YDR235W	2132.75	758.75	0.351839	-1.19041
YFR033C	2101	1179.25	0.560734	-1.18798
YLR137W	1885.5	1047	0.557308	-1.18783
YPL181W	2225.75	1024.5	0.460365	-1.18763
YMR043W	2006.75	739.75	0.363691	-1.18736
YJR145C	2482.75	1034	0.416475	-1.18662
YKR096W	2242.25	930	0.416625	-1.18546
YIL024C	1976.25	1117.75	0.566613	-1.18421
YJR053W	1985	891.25	0.467301	-1.18218
YIL049W	2181	1236.5	0.567363	-1.17863
YDR135C	2496	1124.5	0.452433	-1.17711
YLR055C	1938	1077.25	0.558976	-1.17692
YPL121C	2605.75	1202.75	0.461616	-1.17689
YOR221C	1921	886.75	0.461835	-1.17501
YDR373W	2428.25	725	0.299297	-1.17391
YJR057W	1656.92	639.917	0.374627	-1.17301
YDL224C	2652.25	1200	0.453184	-1.17123
YDR178W	1625.5	744.75	0.45348	-1.16892
YDR022C	2710	1230	0.454369	-1.16196
YOR286W	2499.75	1157.75	0.463394	-1.16163
YDR512C	1952.33	755.917	0.390782	-1.15912
YBL094C	1957.5	983.25	0.503206	-1.15819
YOR025W	2246.5	1080.75	0.480216	-1.15808
YKR037C	1713.21	631.917	0.37014	-1.15748
YPR094W	1762.25	534.75	0.303396	-1.15731
YDR159W	2142	992.75	0.455029	-1.1568
YBR283C	2302.25	1025.5	0.4481	-1.15489
YPL165C	2198.75	1022	0.464275	-1.15407
YMR016C	1397	801.667	0.57295	-1.15367
YOR382W	2298.5	1067.75	0.464437	-1.15267
YNL003C	2080.75	1227.5	0.591034	-1.15217
YLR384C	1783.5	811.583	0.454692	-1.15204
YKR015C	2560.75	1076.5	0.421087	-1.15089
YDR116C	2346.25	1070.75	0.455791	-1.15084
YDR270W	2599.25	1185.5	0.455991	-1.14927
YOR156C	1994.5	961.5	0.481391	-1.14844
YOR016C	2025.75	975	0.481724	-1.1457
YFL036W	1979.75	832	0.41138	-1.14362
YGL166W	2391	1353.75	0.568456	-1.14238
YGL165C	2315.25	1314.75	0.568679	-1.14107
YNL101W	2425.75	1449.25	0.592594	-1.14066
YDR358W	2303.75	1037.25	0.457272	-1.13925
YAL053W	1864.5	928.75	0.5055	-1.13806
YER039C-A	1538.5	632.5	0.412151	-1.13775
YIL013C	2232.25	1284.75	0.572936	-1.13721
YAL055W	2219.25	1114	0.505724	-1.1361
YGR066C	2188.75	1245.5	0.569544	-1.13596
YKL168C	2229.25	947.5	0.423182	-1.13465
YLR314C	2618.5	806.5	0.309094	-1.13424
YCR107W	2435.5	1114.5	0.457968	-1.13325
YIL140W	2675.75	1267.75	0.473798	-1.13049
YJR109C	2362	1029.5	0.423896	-1.12913
YMR133W	1912.5	1102.75	0.576761	-1.1273
YIL035C	2485.5	1428.25	0.574413	-1.12623
YDR282C	2681.5	1230.75	0.459102	-1.12494
YPL027W	2842.25	1349	0.467779	-1.12398
YDR018C	2753.25	1264	0.459301	-1.12337
YMR102C	2146.75	1233.75	0.577685	-1.12091
YLL025W	2383.25	1007	0.424987	-1.12067
YLR398C	1708.25	970.5	0.567609	-1.12045
YEL012W	2292.25	952	0.414675	-1.11855
YPL123C	2608.25	1221	0.46842	-1.11848
YDL138W	2338.5	1067.5	0.454461	-1.11716
YDL077C	1423.42	622.833	0.450074	-1.11533
YMR162C	1755.25	1004	0.578723	-1.11373
YJL120W	1600	734	0.460343	-1.11361
YHL046C	2085.25	1202.25	0.576305	-1.11217
YGL079W	2226.75	1278.75	0.573697	-1.11144
YJR093C	2100	772	0.366128	-1.11057
YIL134W	1612	767.667	0.476321	-1.11042
YPL007C	2197.25	846.75	0.385083	-1.10947
YCR016W	2124.25	967	0.456166	-1.10706
YDR015C	2737.75	1263.5	0.461528	-1.10596
YNL001W	1544.75	892.5	0.582911	-1.10259
YFL040W	2779	1158.75	0.416799	-1.10238
YML102W	2137.75	1006	0.476967	-1.10178
YJL048C	2761	1321	0.477437	-1.10154
YML008C	1886.25	1086.5	0.580502	-1.10142
YLR035C	2206.5	1265.25	0.570698	-1.10024
YMR316C-A	2115.5	1269	0.598129	-1.09982
YGL197W	1552.67	909.333	0.576171	-1.09683
YDL136W	1974.25	889.5	0.457892	-1.09682
YOR196C	1792.75	660.5	0.368619	-1.09665
YLR264W	2047.5	1164.25	0.571287	-1.09639
YAL040C	2222.5	1075.25	0.510409	-1.09498
YPR095C	1833	826.25	0.462638	-1.09462
YCR024C-A	2344.5	1073.25	0.458446	-1.09353
YAL028W	2011.25	1026.25	0.51063	-1.09304
YOR021C	1750.25	855.25	0.488158	-1.09291
YIL053W	2261.25	1328.75	0.57904	-1.09184
YML113W	1962.75	1142.25	0.581902	-1.09173
YGR248W	1786	1016.5	0.579209	-1.09059
YDR107C	2151.25	990.25	0.463543	-1.09019
YNL323W	1658	990	0.599686	-1.08834
YKL124W	2642.25	1132.75	0.429249	-1.08765
YKL112W	1539.8	605.4	0.390998	-1.08642
YOL071W	1515.33	742.667	0.489283	-1.08367
YLR165C	2267.5	1297.75	0.573491	-1.08197
YHR209W	2171	1260.5	0.580404	-1.08171
YJL144W	2762.25	1323.75	0.479993	-1.0812
YJL081C	1822.5	676	0.371685	-1.07953
YMR290C	1432	486.5	0.340491	-1.07942
YOR375C	2398.5	1137.75	0.472972	-1.0794
YGL042C	1962	908.25	0.464488	-1.07933
YPL174C	1761.75	741.125	0.420522	-1.07857
YFL044C	2659	1115.75	0.419962	-1.07831
YPL125W	2276	1076.75	0.473171	-1.07769
YNL016W	1586	954.75	0.601204	-1.07714
YPR138C	1880.25	877.5	0.464906	-1.07587
YJL149W	2008.5	956	0.480665	-1.07585
YKL208W	1660.12	774.542	0.446179	-1.07506
YML003W	2096.5	1225.5	0.584606	-1.07302
YBR250W	2431.75	1119.25	0.462012	-1.07238
YDL084W	1399	553	0.395282	-1.07233
YOL017W	2233.5	1097.25	0.490927	-1.07018
YDR010C	2664.5	1241.25	0.466681	-1.06564
YDL240W	2709.25	1266.75	0.466998	-1.06316
YDL135C	2304.25	1068	0.463583	-1.06307
YNR067C	1967.25	965.5	0.491831	-1.06276
YKL067W	2443.5	1050.25	0.432579	-1.06184
YGL024W	2443.5	1416	0.582223	-1.0611
YML013W	2103.75	1231.5	0.586351	-1.06094
YOR140W	2121.25	1046.25	0.49207	-1.0608
YMR086C-A	2130.75	1249	0.586549	-1.05957
YDR274C	2492.75	1164.25	0.467584	-1.05857
YML017W	2248.25	1318.75	0.586721	-1.05839
YDR406W	3091.5	1446.75	0.467613	-1.05835
YPL139C	2174.5	1028.75	0.475749	-1.05556
YPR026W	2212.5	1035.75	0.467499	-1.05443
YNL335W	2379.5	1435.75	0.604329	-1.05409
YNR056C	1830.75	898.25	0.493256	-1.05107
YJR019C	1846.25	877.5	0.48385	-1.05051
YDL034W	2424.25	1131	0.465826	-1.04977
YDL074C	1675.33	826.25	0.494713	-1.04893
YMR027W	1564.5	916.25	0.5882	-1.04815
YER125W	2046.42	790.083	0.364052	-1.04707
YPR044C	1910.5	895	0.468468	-1.04641
YMR251W	2096	1269.25	0.605482	-1.04558
YGL015C	2210.75	1293.5	0.585192	-1.04357
YDR340W	1625	759.75	0.469542	-1.04326
YPL241C	2109.25	991	0.477282	-1.04239
YNL330C	2614.25	1585.5	0.606028	-1.04155
YHL039W	1957.75	1147	0.58611	-1.0393
YOR309C	1819.62	844.75	0.47287	-1.03913
YBR167C	2379.5	792	0.332857	-1.03802
YMR124W	1825.25	1077	0.589784	-1.03719
YMR061W	1557.75	588.5	0.37951	-1.0358
YOR111W	1937.75	960	0.49524	-1.03479
YJL058C	2309	1128.25	0.485862	-1.0345
YDR256C	2300.25	1066.25	0.470706	-1.03415
YPR189W	2313	1089.5	0.469961	-1.03407
YNR005C	2663	1611.75	0.607357	-1.03175
YML009C	1845.25	1084	0.590578	-1.0317
YPR134W	1816.25	853	0.470311	-1.03117
YKR005C	2884.75	1253.5	0.436639	-1.03039
YCR052W	2280.75	868	0.380556	-1.02995
YOR026W	1840.25	913	0.49591	-1.02929
YNR001C	2075.5	1257.25	0.607939	-1.02745
YJL030W	2764.25	1346.75	0.486749	-1.02744
YDR392W	2415.25	1135.62	0.482106	-1.02736
YCR077C	1562.38	654.25	0.420494	-1.02498
YOR174W	2186.25	778.25	0.356401	-1.02337
YJR043C	2311.12	996.25	0.430646	-1.02055
YOR127W	2173.75	1083.75	0.497046	-1.01996
YIL046W	1374	563	0.409753	-1.01964
YGL227W	2031.5	1196	0.589398	-1.01874
YBR147W	1868.25	970.5	0.519432	-1.0158
YLL029W	2332.25	1023.25	0.438553	-1.01557
YKR032W	2552	1112	0.438595	-1.01523
YNL111C	2434.5	1150.75	0.472293	-1.01479
YDR113C	1627	670.25	0.41171	-1.01251
YPR119W	2011.25	947.25	0.472683	-1.01155
YJL136C	2068.25	940.125	0.46129	-1.01139
YML119W	2166.25	1290.25	0.593609	-1.01072
YER117W	2544.25	1090.25	0.428862	-1.01056
YDR503C	2467.25	1056	0.428932	-1.01004
YGR134W	2451.25	1448.5	0.591342	-1.00726
YHR077C	2099.5	1240.5	0.590661	-1.00548
YDR404C	1494	618	0.413655	-1.00543
YDR206W	1982.25	937.5	0.474432	-1.005
YLR404W	1572.5	888.75	0.585275	-1.00489
YDR077W	2232.75	1055.5	0.474614	-1.00358
YOL106W	2209.25	1104.75	0.499097	-1.00314
YBL007C	1916.5	694.75	0.362394	-1.00226
YLL015W	2528.75	1114.75	0.44029	-1.00211
YKL065C	1752	770.75	0.44047	-1.00071
YBR051W	1920.5	983	0.521161	-1.00064
YPL199C	2243.75	1082	0.482294	-0.999367
YKL189W	1347	458.5	0.342521	-0.998885
YOL132W	1957.75	976.5	0.499798	-0.997379
YFL031W	2051.5	758.5	0.35545	-0.997134
YJL128C	2369.5	1166	0.491075	-0.993017
YLR286C	2311	1357	0.587325	-0.991473
YOR031W	2063.5	1017.5	0.500689	-0.990069
YER016W	2534.75	1089	0.431563	-0.99001
YGL256W	2325.5	1379.75	0.59442	-0.989089
YLR375W	1498.33	877	0.587896	-0.987738
YGR268C	1955.25	1136.5	0.593166	-0.986863
YER094C	1585	665	0.419205	-0.985218
YBR269C	2261.75	1078.5	0.476729	-0.985109
YER062C	2371	1026.5	0.432249	-0.984787
YDR517W	2688.25	1162	0.43229	-0.984476
YHR203C	1942.25	1112.75	0.593519	-0.984241
YLR064W	1568.75	918.25	0.588455	-0.984086
YER111C	2956.75	1279.25	0.432372	-0.983855
YER087C-A	2502.5	1081.5	0.432701	-0.981352
YER069W	1816	786	0.432819	-0.980448
YGL196W	1339.67	800.333	0.596136	-0.978952
YJL181W	2419.75	1188.25	0.492976	-0.977892
YPL197C	2826.75	1356.75	0.484985	-0.976263
YDR020C	2510	1201.5	0.478189	-0.975608
YMR235C	1475.67	626.667	0.421845	-0.975605
YLR007W	1863.75	649.5	0.348689	-0.973912
YPL098C	1990	966.5	0.485277	-0.973759
YMR132C	1911	1144	0.599004	-0.973398
YMR306W	2108.25	1298.25	0.61528	-0.973293
YDR220C	1907.5	906.75	0.478521	-0.973012
YER155C	2260.75	973.5	0.436363	-0.97246
YML059C	1932.5	1159.25	0.599245	-0.971732
YBL049W	2107.25	1101.75	0.524499	-0.97134
YJR121W	2439.25	1084.5	0.44447	-0.969716
YBR246W	1932.25	927.75	0.47939	-0.969327
YEL031W	2247.5	990.5	0.434433	-0.968166
YDR492W	2709.75	1178	0.434551	-0.967273
YOR066W	2051	1033.5	0.503588	-0.966277
YNL318C	2268.5	1396	0.616527	-0.964093
YER185W	2474.25	1075.25	0.435023	-0.963675
YDL011C	2079	993.25	0.480352	-0.963621
YDL170W	2519	1207.25	0.480484	-0.962835
YDR154C	2222.5	1052.75	0.479976	-0.961629
YCL010C	1562.62	682.5	0.439454	-0.960663
YFL029C	2501.75	925.25	0.374309	-0.960282
YIL095W	2606.25	1291	0.495241	-0.95987
YPR192W	2482.75	1188.5	0.479203	-0.957633
YBL056W	1402.5	733.5	0.526094	-0.957343
YMR126C	1695.75	997	0.601413	-0.95673
YGR158C	1423.5	497	0.353126	-0.955942
YJR031C	2335.75	1158.75	0.495828	-0.955198
YAL062W	2097.75	1104.75	0.52642	-0.954484
YOR035C	2537.25	1077.88	0.432037	-0.953297
YLR437C	2225.5	1339.25	0.601935	-0.953114
YKL017C	2478	1106.5	0.446706	-0.952395
YFR046C	2331	1393.75	0.600877	-0.950965
YPL152W	1727	837.75	0.487965	-0.950682
YBR284W	2116.25	1021.75	0.482985	-0.948008
YLR058C	1918.25	1131.75	0.594329	-0.945657
YIL100W	2096	1036.25	0.497236	-0.943996
YDL002C	1699.33	750.167	0.443479	-0.94365
YLR381W	1947.25	1162	0.594717	-0.943124
YGL211W	1820.75	1088.25	0.60234	-0.942327
YGL057C	1393	846	0.602365	-0.942176
YKL178C	2394	1074	0.448132	-0.941348
YLR190W	1397	829.5	0.595142	-0.940343
YPL009C	3086.25	1514.25	0.489186	-0.940203
YLR451W	2390.75	1443.5	0.603912	-0.939433
YLR274W	1894	814.25	0.431881	-0.939063
YKL034W	2738	1222.75	0.448467	-0.93875
YJL082W	2022.5	966	0.481492	-0.938702
YKR067W	2507.25	1128.75	0.448573	-0.937931
YDR316W	2175.75	1050.25	0.483332	-0.935374
YJR149W	2290.75	1026.25	0.448982	-0.934756
YDR394W	1658.75	658.75	0.397662	-0.934374
YHR117W	2329.25	1410.75	0.600249	-0.934227
YOR076C	2016	1020.75	0.507612	-0.933254
YLR117C	1522	605	0.397915	-0.932961
YBL047C	2121.5	1123.75	0.528927	-0.932478
YER004W	2474	1087	0.439197	-0.931905
YLL019C	2981.75	1341.5	0.449461	-0.931043
YDR117C	2665.5	1289.25	0.48401	-0.930065
YAL056W	2117.75	1104.25	0.529243	-0.929706
YNL270C	1914	1172.75	0.621211	-0.92954
YML118W	2338.75	1409.5	0.605535	-0.928207
YKL081W	2515.25	1134.75	0.449859	-0.92796
YJL171C	2468.5	1233	0.499502	-0.925967
YBR009C	1576.5	848.5	0.529845	-0.924423
YPL069C	2218	1100	0.491134	-0.923477
YGL222C	2139.75	1297.5	0.605675	-0.922632
YPR086W	1956.38	743.625	0.365558	-0.921879
YHL022C	1905	1158.25	0.601993	-0.921265
YAL008W	1818	959.25	0.530252	-0.920855
YPR135W	1746.88	811.5	0.464359	-0.918886
YOR283W	2405	1184	0.491824	-0.917556
YJR076C	2180.96	882.375	0.407355	-0.91676
YML100W-A	2311	1404	0.607267	-0.91622
YDR293C	2430.25	1167.62	0.474805	-0.915811
YNL224C	2179.5	1367.25	0.623309	-0.914062
YLR293C	2416	971.25	0.401507	-0.912891
YNL105W	1949.25	1209.75	0.623799	-0.910449
YMR285C	2013	1256.5	0.623871	-0.909915
YFR043C	2265	1379.25	0.607848	-0.909802
YKL009W	2373.5	1069.75	0.452228	-0.909611
YML001W	2234.25	814	0.364626	-0.909377
YNL157W	1911.25	1186.5	0.623977	-0.909132
YLL040C	2314.75	1018.5	0.452434	-0.90801
YOL158C	1716.25	873.75	0.511002	-0.905428
YHL010C	1873.75	1132.25	0.604213	-0.904765
YPL239W	1889.75	932.5	0.493403	-0.904
YBR135W	2195.12	903.625	0.360972	-0.903794
YLR150W	1785	1071	0.600891	-0.902732
YGR170W	2118	1281.5	0.604487	-0.902732
YPL245W	2350.25	1157.5	0.493554	-0.902698
YBR146W	1873.75	994.5	0.532385	-0.902136
YMR234W	1662	1006.5	0.609466	-0.901005
YMR166C	2223.5	1353	0.609479	-0.900915
YGL054C	1481.5	905	0.609406	-0.900608
YGL112C	1676.75	740	0.442528	-0.900292
YDR497C	2757.75	1220.75	0.443411	-0.899834
YOL011W	2272.75	1163.5	0.511806	-0.898835
YPR108W	1672	599.75	0.367254	-0.898735
YOL121C	1799.25	886.75	0.511824	-0.898689
YGR141W	1951.75	1172.25	0.609773	-0.89844
YKR062W	1801.67	795.667	0.443153	-0.898016
YGL071W	2020.75	981.25	0.48657	-0.89671
YPR096C	2303.5	1153.5	0.486609	-0.896386
YBR016W	1995.75	1069.25	0.533073	-0.896101
YLR412W	1399.25	842.25	0.602159	-0.894439
YJL091C	1793	705	0.393196	-0.893743
YDL076C	1755.5	865.25	0.492217	-0.893259
YPL226W	2630.25	1304.25	0.494703	-0.892832
YCR088W	2096.75	1032.5	0.492292	-0.89281
YMR007W	2073.25	1263.25	0.610726	-0.892286
YNR039C	1960.5	1007	0.512851	-0.890259
YDL019C	2268	1117.5	0.492828	-0.889633
YDL134C-A	2235.5	1102	0.493191	-0.887478
YOR151C	1955.75	792.25	0.406106	-0.887192
YPL209C	1436.5	598.25	0.406257	-0.886348
YGL039W	1595	976.75	0.61184	-0.886232
YNL054W	1975.5	1240	0.627081	-0.886232
YMR134W	1860.75	919.75	0.446423	-0.886109
YBR110W	1806.75	714.75	0.395419	-0.88591
YPL064C	2141.25	1061	0.495563	-0.885453
YER059W	1630.67	723	0.445359	-0.885011
YDL117W	2045.5	1019.75	0.493664	-0.884678
YPL024W	1442	705.5	0.495674	-0.884496
YMR306C-A	2092.5	1319.75	0.627321	-0.884466
YOR057W	1810.5	719.25	0.40006	-0.883613
YJL106W	2336	1138.5	0.488211	-0.883135
YLR401C	2538.25	1530.75	0.603918	-0.882935
YLR180W	1486.75	894	0.603957	-0.88268
YDL059C	2425.5	1197.5	0.494017	-0.882581
YPR069C	1883.5	925.25	0.488883	-0.877577
YIR009W	2057.75	1039.75	0.505604	-0.877411
YBR154C	2325.71	1141.71	0.449499	-0.874909
YER178W	1269	567	0.446809	-0.873977
YLR082C	1623	981.5	0.605373	-0.873415
YBR183W	2327.75	1218.5	0.535821	-0.871981
YLR290C	1778.75	1069.5	0.605711	-0.871207
YLR152C	2078.25	1260	0.605742	-0.870999
YAR014C	1646.75	874	0.535934	-0.870994
YGR084C	1774.67	1081.33	0.614456	-0.870787
YGL114W	1749	1044	0.614514	-0.870445
YBR266C	1892	938.25	0.496193	-0.869675
YMR055C	1943	1190.25	0.614037	-0.869377
YKL121W	2874	1316.5	0.457605	-0.867947
YPR198W	2522	1236.75	0.490074	-0.867735
YMR157C	1724.25	1059.5	0.614302	-0.867542
YGR105W	1384	853.667	0.615062	-0.867209
YGL243W	2523.5	1548.5	0.615445	-0.864953
YHR121W	1934	1179.33	0.609607	-0.864674
YLR422W	1954.75	1205.5	0.614775	-0.864273
YIR019C	2274.5	1153.75	0.5073	-0.863916
YIR032C	2360.75	1198.25	0.507343	-0.863577
YPR174C	2414	1184	0.490721	-0.862379
YDL041W	2270	1130.5	0.497764	-0.86036
YDR357C	2568	1282	0.49304	-0.859416
YJL148W	2398.5	1224	0.507558	-0.859156
YOR338W	2195.25	1095.25	0.498658	-0.858878
YBL023C	2074	943	0.454006	-0.858497
YOR262W	1446	582	0.403363	-0.857926
YNR033W	2247.25	1101.25	0.491267	-0.857868
YNL138W	1861	791.25	0.425922	-0.857626
YNL153C	2040.67	923.528	0.437932	-0.856221
YDR042C	2171.5	1066.25	0.491507	-0.855881
YJL092W	2579	1266.5	0.491554	-0.855488
YHR125W	2035.5	1240.5	0.610964	-0.854588
YNL180C	2265.75	1111.5	0.491683	-0.854425
YBR189W	1532	824	0.537859	-0.854101
YDR048C	1847.25	913.25	0.493867	-0.85295
YPL196W	2430.25	1211.25	0.499464	-0.851962
YLR100W	2080.5	788.5	0.378816	-0.851915
YKR022C	2092.75	866.25	0.412448	-0.851755
YGL198W	1518	957.5	0.617802	-0.851035
YBR204C	1570.5	839	0.538351	-0.849782
YGL082W	2053	1268	0.618078	-0.849403
YER157W	1680.5	732.875	0.434368	-0.849365
YBR290W	2539.75	1270.75	0.499684	-0.848972
YDL176W	2203.25	1095.25	0.499741	-0.848637
YOR354C	1871.75	934.75	0.500019	-0.847202
YGR143W	2551.5	1584	0.618551	-0.846609
YER173W	2571	1155.75	0.450431	-0.846404
YDL195W	2351.5	891.75	0.380527	-0.844989
YDR045C	2357	1070.25	0.457725	-0.844956
YJL212C	2354.75	1201	0.509745	-0.844463
YDL020C	2055.25	955.5	0.465166	-0.843851
YJL155C	2835.5	1444.75	0.509886	-0.843339
YKL078W	2042.75	777.75	0.381122	-0.842578
YEL052W	2734.33	1243	0.451022	-0.841909
YHR127W	2020	1238.5	0.612687	-0.841788
YLR357W	1442	880	0.610264	-0.841424
YLR235C	1440.33	879.667	0.610293	-0.841233
YOR079C	1917	990.25	0.518868	-0.840881
YBL011W	1588.5	859	0.539372	-0.840828
YGL214W	1851.33	1127.33	0.619591	-0.84047
YMR317W	2331.75	1488	0.633391	-0.839681
YBR193C	1709.75	684.625	0.402622	-0.839243
YBR232C	2416.75	1212.5	0.50135	-0.839092
YLR234W	1933.5	1182.5	0.610729	-0.838377
YFL018C	2383	1077	0.451502	-0.838253
YEL042W	2723.5	1241.5	0.451628	-0.837294
YPL272C	2195.75	1083.5	0.493765	-0.837204
YEL033W	1570.33	706	0.451664	-0.837019
YLL002W	2081.88	922.375	0.453386	-0.836389
YMR106C	1782	1095.5	0.618808	-0.836365
YML103C	2016.38	1077	0.532237	-0.836079
YBR024W	1719.75	926	0.539983	-0.835465
YBR294W	2395.5	1202.75	0.502147	-0.834368
YDL169C	2110.75	1039	0.502335	-0.833251
YBR082C	1872.33	966.333	0.508729	-0.832211
YPL208W	2199.75	1101	0.501863	-0.831368
YOR189W	1923.75	993.25	0.520138	-0.830454
YPL019C	2525.25	1271.5	0.502032	-0.829919
YHR015W	2211.25	1364.25	0.614439	-0.828769
YGR271W	2252.25	1096.25	0.494809	-0.828576
YGL023C	2463	1547.25	0.621646	-0.828337
YBR238C	2209.25	1111.5	0.503195	-0.82815
YNL223W	2091.25	1329.25	0.635231	-0.82611
YDL028C	1802.73	784.6	0.41704	-0.826095
YDR501W	2519	1140.5	0.453105	-0.826051
YHR154W	2044	1243	0.614933	-0.825092
YDL144C	2091.5	1047.5	0.503786	-0.824648
YHR047C	1618.67	996.667	0.615157	-0.823427
YDR181C	2300.75	1141.25	0.497941	-0.821078
YIL039W	2335.75	1442	0.615513	-0.820785
YDL056W	2931	1477.25	0.504504	-0.820387
YJL107C	2158.25	1069.25	0.495807	-0.820321
YGR210C	2468.25	1513.75	0.615586	-0.820239
YPL030W	2619.75	1316.25	0.503226	-0.819663
YPL154C	1470.75	738.75	0.503244	-0.819515
YGL260W	2119	1319	0.62343	-0.817806
YJL088W	2557	1312	0.513101	-0.817755
YLR418C	1639.5	909.125	0.546186	-0.817293
YER046W	1966.5	909.25	0.454783	-0.813286
YBR270C	2542.75	1288.5	0.505732	-0.813108
YAL036C	2364.5	1279	0.542633	-0.812208
YNL326C	2314.5	1476	0.637346	-0.810506
YLR212C	2179.5	848.75	0.389065	-0.810414
YLR348C	1548.33	949.667	0.615286	-0.80857
YPR191W	1776.25	887.75	0.494895	-0.808518
YKL204W	2243	1044	0.465448	-0.80718
YGR282C	2046.75	1243.25	0.617351	-0.807121
YMR247C	1653	1043.25	0.637926	-0.806224
YAL024C	1999.5	993.25	0.497526	-0.806102
YJR017C	2321.75	910	0.39016	-0.805982
YJR073C	2532.25	1355.88	0.520993	-0.804631
YBR068C	2164.25	1172.75	0.543576	-0.803934
YGL081W	1934.5	1211	0.625792	-0.803861
YBR064W	1804.75	968.5	0.543606	-0.803673
YPR064W	2319.5	1155	0.497862	-0.803327
YDR152W	2751.5	1377	0.500383	-0.801975
YNL136W	1643.75	980.75	0.589196	-0.800935
YHR135C	2128.75	1316.5	0.618239	-0.800527
YCL044C	2031.25	1033.25	0.507958	-0.799906
YEL013W	2677.75	1223.75	0.456594	-0.799502
YOR239W	2094.75	1058.5	0.50566	-0.798767
YNL104C	2253	1439.5	0.639263	-0.796364
YOR154W	1813	941.5	0.524365	-0.795763
YKR041W	2426.75	1132.25	0.46708	-0.794539
YOR188W	2239	1174.5	0.524608	-0.793773
YPL187W	2270	1150.5	0.506333	-0.792993
YDR461W	2659.25	1330	0.499116	-0.792952
YGL153W	2202.25	1382	0.627651	-0.792885
YJR049C	2538	1313.5	0.51625	-0.792701
YNL011C	2273	1132.75	0.499152	-0.792657
YDL127W	2041.25	992	0.509227	-0.79238
YER010C	2726.25	1245.75	0.457602	-0.79183
YGL020C	2570.5	1616.25	0.627887	-0.791489
YGR228W	2494.5	1559.75	0.619462	-0.791433
YNL232W	2971.5	1257.75	0.423267	-0.791304
YNR073C	2430.5	1274.75	0.524947	-0.790987
YOR251C	2244	1139.75	0.506577	-0.790896
YLL048C	1532	943	0.617997	-0.790834
YDL064W	1484.25	583.25	0.393922	-0.790747
YBL093C	1797.25	766.25	0.423427	-0.79041
YER109C	2669.25	1224.5	0.457796	-0.79035
YJL045W	2585.5	1332.25	0.516723	-0.788934
YML058C-A	2462.5	1536	0.625665	-0.788918
YDR214W	2565.5	1287.75	0.502063	-0.788828
YMR075W	1973.75	1092.5	0.553021	-0.788104
YER083C	1758.83	761.458	0.431377	-0.787503
YBL028C	2210.25	1208.25	0.545487	-0.787159
YOR345C	2318.75	1158	0.499866	-0.786749
YDR363W-A	2114.5	1051.25	0.502375	-0.786388
YML018C	2321.5	1446.5	0.626275	-0.7847
YGL014W	2045.75	1283.25	0.629222	-0.783605
YBR213W	2724	1471.75	0.545933	-0.783248
YMR122C	2207.25	1377.75	0.626596	-0.782474
YGL075C	1932.38	821.75	0.424887	-0.782248
YGL116W	2338.75	1028.5	0.429246	-0.782072
YBR286W	2009.5	1024.75	0.511048	-0.781582
YMR110C	1874.75	1170.5	0.626898	-0.780384
YPR004C	1997.75	998.5	0.500727	-0.779627
YHL012W	2268.75	1407.25	0.621324	-0.777593
YOL117W	2276.5	1192.75	0.526589	-0.777513
YIL146C	2723.75	1410.5	0.518307	-0.776331
YAL018C	2364.5	1278.25	0.547179	-0.772317
YJL122W	2304.5	1196	0.518887	-0.771716
YLR119W	1483.38	850	0.573267	-0.771022
YMR277W	2130.25	854.25	0.39891	-0.77055
YCR005C	1911.5	977.75	0.512979	-0.770126
YNL145W	2269.25	1458.75	0.64311	-0.767982
YFL050C	2187.5	986.25	0.460775	-0.767678
YDL026W	1920.75	977.25	0.513469	-0.767221
YKL218C	2796.25	1318.5	0.471126	-0.763187
YNL053W	1898.25	944.5	0.502757	-0.762838
YBL072C	2058.75	1121.25	0.548267	-0.762772
YNL093W	2150.75	1387	0.643898	-0.762169
YMR272C	1974.38	1058.25	0.54819	-0.761975
YER041W	1724	797.75	0.461635	-0.76113
YDL145C	1676.75	722.5	0.430964	-0.760686
YJL169W	2850	1481	0.520282	-0.760619
YBR026C	1553.54	784.375	0.510212	-0.759526
YIL114C	2042.75	1026	0.520453	-0.75926
YER084W	1687.67	770	0.462155	-0.757178
YLR282C	2173.75	1361	0.623167	-0.757018
YEL060C	2115.75	977.5	0.462246	-0.756483
YLL024C	2371.25	1113.5	0.472126	-0.755443
YNL037C	1358.25	875.25	0.64488	-0.754927
YNL255C	1640	1052.25	0.644964	-0.754307
YOR215C	2217	1130.75	0.51092	-0.75361
YPR090W	1632.75	821.5	0.504018	-0.752414
YML124C	2462.75	1556.25	0.63111	-0.751239
YKL123W	2808.75	1327.25	0.472714	-0.750881
YLR083C	1418	885	0.624118	-0.750791
YDL208W	2229	959.25	0.430624	-0.750197
YDR511W	2775.25	1283.75	0.463245	-0.748877
YDL174C	2772.25	1436	0.516586	-0.748737
YER079W	2674.25	1237.25	0.463322	-0.748291
YDL210W	2309.5	1170	0.507423	-0.746894
YLR170C	2392.5	1493.5	0.624747	-0.74668
YNL199C	2202	1422	0.64601	-0.746587
YFR034C	2244.5	1426.5	0.635602	-0.745938
YOR333C	2006.5	1012.5	0.504877	-0.745308
YJL194W	1410	611	0.435343	-0.745261
YPR024W	1829.25	920.5	0.505009	-0.744216
YOR177C	2228.25	1182	0.530692	-0.743845
YLR459W	1775.42	821.667	0.437484	-0.741759
YLR171W	2248.5	1408.75	0.625531	-0.741548
YIR033W	2366.75	1236.5	0.522805	-0.740544
YJR051W	2499	1308.75	0.522846	-0.740217
YNL336W	2092.5	1354	0.646886	-0.740129
YBL041W	2245	914.5	0.4068	-0.738601
YER123W	1888.25	860.25	0.464769	-0.737275
YJL176C	2661.75	1392.5	0.523244	-0.737048
YBL062W	1939.5	1066	0.551266	-0.736449
YKL130C	2733.5	1297.5	0.474616	-0.736143
YPL076W	1956.25	941.375	0.464087	-0.735756
YMR224C	1669.42	996.917	0.601681	-0.73523
YPL155C	1836	924.5	0.513119	-0.734736
YNR065C	1909.75	1014.25	0.53187	-0.734175
YPR075C	2400.25	1215	0.506246	-0.733985
YML022W	1887.75	1181.75	0.633692	-0.733374
YBR295W	2212.75	1140.25	0.519212	-0.733162
YDL200C	2243.25	1142	0.509182	-0.733135
YGL078C	1836.75	1171.25	0.63778	-0.733079
YJL066C	2142	1119.75	0.523792	-0.73269
YNL237W	2520.25	1632	0.647922	-0.732483
YDR351W	2672.25	1363.75	0.509307	-0.732159
YOR009W	1897	1010.25	0.532212	-0.731372
YPR066W	2314	1177.5	0.506771	-0.729647
YGR208W	2222	1399.5	0.627853	-0.72907
YMR289W	2131.75	1383.5	0.648418	-0.72882
YBR057C	1959.5	1107.12	0.558584	-0.728614
YPL250C	2906.25	1487.5	0.513848	-0.728477
YMR316C-B	2072.75	1343.75	0.648564	-0.727747
YKR092C	2431.5	1042	0.425886	-0.727527
YKL151C	2191.5	1043	0.475959	-0.725739
YPR184W	2154.75	1089.5	0.507257	-0.725626
YGR261C	2720.5	1704.25	0.62834	-0.725453
YER067W	1828.75	847.5	0.466377	-0.725038
YHL007C	1925.5	1194.25	0.628837	-0.721758
YLR340W	1971.75	858.25	0.435746	-0.721578
YER002W	2077	964.75	0.466845	-0.72148
YLR385C	2328.5	1466.75	0.628651	-0.721141
YOL029C	2129.5	1138.25	0.5335	-0.720797
YMR190C	2063.75	1131.25	0.546238	-0.720267
YGL177W	1930	1222.25	0.63995	-0.720267
YDR072C	1707.5	866	0.510931	-0.719447
YNL288W	2075.75	1349.75	0.649705	-0.719327
YIL005W	2055.75	1295	0.629188	-0.719149
YNL325C	2381.25	1548.75	0.649878	-0.718052
YER129W	2540	1188.25	0.467389	-0.717339
YKR029C	2601.5	1244.5	0.47721	-0.716048
YMR019W	1769.5	1122	0.636239	-0.71575
YOR059C	2333	1245.5	0.534188	-0.715151
YJR118C	2478.75	1165.5	0.477337	-0.715064
YFR032C-A	1952.25	1122.75	0.575562	-0.714281
YCR014C	2551.75	1339.25	0.522463	-0.713886
YKL144C	1474	638	0.437312	-0.712826
YGR183C	1771.25	1115.5	0.63006	-0.712669
YOL007C	2076.5	1111.75	0.534559	-0.712112
YPL244C	1948.5	983.75	0.515793	-0.71178
YBR223C	1777.75	988.5	0.554079	-0.711766
YNL107W	1974.5	1278.25	0.650755	-0.711583
YMR191W	2275.75	1457.5	0.637059	-0.710077
YCL060C	2073.5	1083.5	0.523142	-0.709859
YPR188C	2421.75	1235	0.509301	-0.708725
YMR238W	1529	971.5	0.637303	-0.708389
YLR065C	1753.25	1103.5	0.630622	-0.708247
YOL057W	1718.75	916.25	0.535114	-0.707555
YPL157W	1666.67	880.333	0.516468	-0.705981
YCR079W	2031.33	1060.33	0.523908	-0.705317
YBR242W	1981.25	1036	0.52404	-0.704532
YPL141C	2904.5	1501.75	0.516754	-0.703523
YLR391W	2305	1457.5	0.631386	-0.703251
YKR106W	2280.25	1091.5	0.478879	-0.70312
YLR138W	1924	1214.75	0.631442	-0.702882
YBR212W	1951	1078	0.555136	-0.70249
YKR016W	2303.75	1104	0.479036	-0.701898
YBL085W	2093	1143.25	0.555663	-0.697864
YLL004W	2092	864.25	0.416903	-0.697691
YML075C	2056.25	1305.75	0.638863	-0.697595
YPL138C	2096	1082	0.517498	-0.697139
YHR004C	2356	1489.5	0.632244	-0.696439
YNL295W	1512	983.25	0.652997	-0.695043
YFL006W	2119	989.5	0.47047	-0.693886
YLR269C	1639	1017	0.63282	-0.693867
YKR086W	1843.88	849.75	0.439548	-0.693228
YNR035C	2366	1155	0.477521	-0.693207
YNL339C	1877.25	1225.25	0.653307	-0.692753
YML026C	1989.25	1271	0.639596	-0.692526
YPL156C	2236	1160.25	0.518039	-0.692491
YCL052C	2008.75	892	0.441113	-0.691584
YOR350C	1613.5	829	0.518157	-0.691478
YPL164C	2131.25	1105.5	0.518178	-0.691304
YHR066W	2004.5	1063.17	0.490236	-0.690812
YJR030C	2589.75	1369.75	0.529066	-0.690728
YPR017C	2123	1069.75	0.511826	-0.687838
YIR031C	2684	1431.75	0.529552	-0.686859
YMR245W	1316.67	861	0.654221	-0.686014
YMR225C	2264.5	1436	0.640558	-0.685864
YMR070W	1607.5	1031	0.640617	-0.685458
YMR240C	1670.25	761.75	0.452378	-0.685246
YBR300C	1800.75	926	0.527311	-0.685131
YMR310C	2127.75	1392	0.654374	-0.684886
YIL126W	1372.88	658.5	0.476096	-0.684578
YLR335W	1815	1150.75	0.634317	-0.684078
YFR016C	2027.75	1310	0.646318	-0.682672
YEL011W	2452.5	1160	0.471945	-0.682663
YKL107W	2251	1080.5	0.481796	-0.680513
YLR350W	1464.5	929	0.634888	-0.680341
YPR009W	2036.75	1044.75	0.51274	-0.680283
YDR481C	2385.25	1118.25	0.472297	-0.679986
YLR050C	2198.75	1407.25	0.635156	-0.678591
YCR031C	2002.67	1056.33	0.528828	-0.676139
YMR192W	2102.75	1350.5	0.641966	-0.676126
YPR073C	1724.25	883.75	0.513558	-0.673515
YJL130C	2185.75	1160.75	0.5313	-0.672949
YPR165W	1477.25	667.25	0.456018	-0.672422
YOL035C	1428	772.25	0.539477	-0.67175
YBL034C	1940.62	890.688	0.475839	-0.669379
YKL087C	1879.5	971.75	0.514076	-0.669232
YHR134W	2123.25	1350.75	0.636245	-0.666704
YBR175W	1565.25	945	0.617822	-0.666278
YCR073W-A	2055.25	1070.5	0.530492	-0.666269
YOR157C	2228	951.75	0.424712	-0.666071
YPL094C	1443.67	728.667	0.506869	-0.666006
YLR133W	1577.67	980.667	0.637224	-0.665064
YMR251W-A	2227.5	1459.75	0.657162	-0.664315
YIL036W	2278.75	1451	0.636578	-0.66423
YGL258W	2032.75	1319.5	0.649471	-0.664052
YPL223C	2590	1346.75	0.521418	-0.663485
YOL070C	1989.5	1073	0.54054	-0.663025
YBL029W	2078.5	1160.25	0.559653	-0.662853
YGR067C	2030.5	1043.25	0.514856	-0.662779
YMR302C	2671.25	1755.75	0.657385	-0.66267
YER187W	2465.25	1172.5	0.474605	-0.66242
YLL020C	2787.5	1348.5	0.484208	-0.661825
YHR105W	2431.25	1555	0.636939	-0.661545
YDR096W	2089.25	1061.5	0.518341	-0.661477
YAL048C	2025.5	1045.75	0.515024	-0.661396
YNL219C	1974.25	1296.25	0.6576	-0.661083
YOR050C	2321	1254.75	0.540789	-0.660978
YER131W	1592.33	763	0.474861	-0.660472
YAR050W	2122.25	1177.5	0.560021	-0.659626
YPL266W	1722.75	787.75	0.459688	-0.659493
YOL002C	2342.5	1270.25	0.541094	-0.65848
YPR140W	1963.75	1012.75	0.515417	-0.658144
YIL083C	2527.5	1133.25	0.447154	-0.657832
YDR127W	2715	1409	0.518969	-0.656566
YDR029W	2271.25	1172.25	0.515638	-0.656311
YOL014W	2411.5	1306.75	0.541383	-0.656106
YNL140C	1721	1125.25	0.658591	-0.653772
YOL052C	2104.5	1139.25	0.541793	-0.652742
YMR196W	1562.25	994.25	0.645394	-0.652403
YHR176W	2077.5	1331.25	0.638321	-0.651278
YLR196W	1638	827.5	0.5119	-0.647688
YNL129W	1792.25	1174.75	0.659554	-0.64667
YLL045C	1829.25	898.75	0.486181	-0.646543
YMR078C	2029.62	1145	0.563343	-0.646021
YBR098W	1612.75	904.75	0.561668	-0.645168
YDR265W	2744.75	1426	0.520444	-0.645026
YMR210W	1999.25	1292	0.646486	-0.64485
YEL007W	2399	1151.25	0.47693	-0.644721
YDL043C	1526	686	0.449541	-0.644493
YDR046C	2126.25	1092.75	0.517087	-0.644334
YFL063W	2328	1203.25	0.517209	-0.643326
YIL045W	2227.5	1425.5	0.639462	-0.642795
YMR236W	1898	881	0.464734	-0.641715
YOR257W	1922.62	833.125	0.428143	-0.641234
YOL061W	2101.5	1142.75	0.543273	-0.640597
YGL017W	2286.75	1493.25	0.653459	-0.640508
YDR105C	2104.5	1101.75	0.521145	-0.639536
YNL197C	2275.5	1506	0.660564	-0.639217
YER060W	1930.75	913	0.477707	-0.63881
YDR207C	2149.75	1129	0.521297	-0.638351
YNL189W	2278.67	1020.33	0.450728	-0.637861
YER091C	2790.5	1333.5	0.477991	-0.636643
YLR020C	1907.5	1228.5	0.641694	-0.635822
YJL187C	2561.25	1373	0.536035	-0.635273
YPR046W	2754	1429.5	0.518222	-0.634948
YMR031C	1664.75	1082.5	0.647939	-0.634797
YNR040W	1972.5	1073.75	0.544033	-0.634356
YKL205W	2701.25	1326	0.487801	-0.633989
YLR174W	1839	1161.25	0.642142	-0.63289
YDR085C	2477	1300	0.522142	-0.631739
YDR428C	2269	1084.5	0.478688	-0.631344
YLR272C	1447	677	0.467865	-0.630688
YFL039C	2003.4	922.858	0.46309	-0.630167
YJL072C	2929.25	1272.75	0.434086	-0.628113
YPR106W	2037	1057.25	0.519102	-0.62767
YNL008C	1671.75	1098	0.662215	-0.627035
YJL211C	2035.25	1090.75	0.537239	-0.625695
YML062C	1889.5	1229.25	0.64965	-0.622958
YFR053C	1810.75	1159.75	0.656472	-0.622717
YPR030W	2027.5	1050.75	0.519751	-0.6223
YDR480W	2496.75	1198.75	0.47989	-0.622195
YLL063C	1968	1267.5	0.64379	-0.622109
YLR427W	1905.5	1239	0.649901	-0.621218
YHR159W	2220.5	1426.25	0.642371	-0.621177
YBR085W	1859.25	967.5	0.519911	-0.620978
YIL120W	2543.25	1367	0.538233	-0.617787
YGL138C	1649.5	1074.75	0.657429	-0.617066
YDR238C	2183.75	1077.5	0.501715	-0.616821
YPL055C	1892.04	934.458	0.482375	-0.616795
YDR013W	2490.25	1089.5	0.437131	-0.615782
YGR092W	1954.62	1108.13	0.558841	-0.615058
YDR246W	1633.25	739.25	0.455151	-0.613149
YOL081W	2262.12	1401.38	0.607088	-0.612476
YAL037W	2187.25	1203.5	0.565445	-0.612029
YIL109C	1684	724.5	0.438091	-0.611894
YGR096W	2105.25	1367.75	0.658415	-0.611245
YBR298C	2254.5	1214.25	0.539892	-0.610523
YHR025W	1610.25	1034	0.643984	-0.609189
YDL046W	2747.5	1494	0.540154	-0.608966
YMR127C	1652.75	1051.75	0.651825	-0.607906
YDR155C	1841	973	0.525423	-0.606072
YKL010C	2598	1276.5	0.491526	-0.605126
YDL140C	1596	836	0.52381	-0.60432
YLR177W	2261.75	1458.75	0.646539	-0.604129
YNL087W	2085.25	1391	0.665654	-0.60167
YLR408C	1535.75	970	0.646946	-0.601465
YER130C	2046.75	964	0.482708	-0.600745
YBR094W	1685.25	951.5	0.566802	-0.600122
YNR017W	1859.5	978.5	0.525342	-0.598741
YDR119W	2441.25	1287.5	0.526402	-0.598412
YER005W	2587.75	1248.25	0.483058	-0.598078
YER137C	1679	817	0.483095	-0.597799
YBR072W	2086.25	1155.75	0.567127	-0.597264
YDR374C	2722.25	1425.5	0.526592	-0.596929
YDR494W	2506	1211.25	0.48327	-0.596464
YIL048W	2365	1084.5	0.458164	-0.596312
YOR123C	2018.88	1033.12	0.516822	-0.595797
YBL005W	1479.33	839.667	0.567305	-0.595701
YJR096W	1623.75	878.5	0.541059	-0.595298
YGL213C	1744.25	946.542	0.521393	-0.594878
YNR018W	1407	938	0.666667	-0.594196
YPR065W	2512.75	1315.25	0.523173	-0.594002
YBR053C	2155.75	1221.5	0.567555	-0.593511
YJL039C	2417	1112.25	0.458711	-0.593257
YER007W	2877.5	1390.25	0.483846	-0.592085
YBL100C	1782.5	1005.25	0.567806	-0.591311
YDR145W	1902.38	906.875	0.476597	-0.591214
YBR052C	1917.75	1089	0.567847	-0.590948
YFR028C	1803.76	991.583	0.505512	-0.589412
YGR289C	2172.25	1137	0.523754	-0.589197
YGR139W	2020	1309.75	0.66216	-0.589132
YGR195W	3185.75	1414.75	0.443784	-0.588841
YNR007C	2047.25	1359	0.667412	-0.588699
YIL022W	1363	654	0.479943	-0.588137
YOR313C	2457.25	1310	0.530228	-0.587853
YBR291C	2336.5	1276.5	0.54373	-0.587765
YMR308C	1956.38	911.75	0.448979	-0.58773
YLR168C	2257.25	1464	0.649144	-0.587084
YNL085W	1999.75	1332.75	0.667758	-0.586144
YFR022W	2234.5	1480.25	0.662717	-0.585844
YNL204C	2110.25	1401.75	0.667863	-0.585367
YIL059C	1758.25	1130	0.647274	-0.584737
YGR234W	2215.5	1427.5	0.647342	-0.584229
YAL013W	2410.75	1113.25	0.46036	-0.584041
YOR363C	2380.5	1275.5	0.530697	-0.583828
YLR166C	2090.5	998.25	0.481264	-0.583481
YMR206W	2500	1639.5	0.655558	-0.582075
YDR086C	2379.75	1147.75	0.482035	-0.580768
YLR367W	2311.88	1293.38	0.561455	-0.579102
YNL312W	1344.5	649	0.482836	-0.577944
YJR150C	2145	1061.25	0.495095	-0.577473
YOL112W	2158.25	1189.5	0.550999	-0.577193
YDL099W	2055	1121.75	0.545537	-0.577047
YIR018W	2417.25	1314.25	0.543429	-0.576442
YDR153C	2714.75	1427.25	0.529318	-0.575599
YFL052W	3048.75	1487.75	0.486021	-0.575532
YFL054C	2204.75	1034	0.486028	-0.575475
YDR245W	2266.88	1091.62	0.462392	-0.574665
YAL023C	1988.5	1129	0.569707	-0.574628
YPL265W	1977.25	1039.75	0.525722	-0.572916
YNL334C	2236	1500.75	0.669553	-0.572906
YLR176C	2367.5	1544.5	0.651486	-0.571765
YFR017C	2153	1431.5	0.665281	-0.570706
YLR086W	1921	1025.25	0.533074	-0.570584
YDR460W	1678.5	752	0.448404	-0.570135
YDL017W	2267.25	1017.75	0.448834	-0.568391
YDR009W	2851	1509	0.53029	-0.567994
YNR043W	1848.75	857.25	0.463322	-0.567493
YFL041W	2683.5	1307.5	0.487289	-0.565879
YDR430C	2532	1237.5	0.487405	-0.564994
YJR094C	1970.75	1062.25	0.54489	-0.564816
YKL106W	2284	1112.25	0.496776	-0.564454
YER061C	1873.25	913.75	0.48753	-0.564044
YKR084C	2180.25	1131.12	0.517589	-0.563741
YGR232W	2231.75	1468.5	0.650155	-0.563325
YDR352W	2500	1327.5	0.531008	-0.562377
YBR109C	1907.12	940.75	0.488625	-0.561732
YFL034W	2809.5	1372.75	0.487997	-0.560491
YLR373C	1948.25	1271.75	0.65333	-0.559703
YJR011C	2409	1310	0.545632	-0.558908
YGR072W	2157.75	1451.25	0.667335	-0.558579
YIL071C	2579.75	1410.5	0.545676	-0.558563
YDR004W	1848.5	990.167	0.540938	-0.557213
YJL103C	2347	1237	0.527627	-0.557167
YGR149W	1828.5	1201.75	0.667621	-0.556893
YHR186C	2567	1155.25	0.451797	-0.556395
YMR232W	1569.5	1034.75	0.659339	-0.555915
YDR490C	2875.75	1410.75	0.488631	-0.555664
YDL149W	2311.75	1266.5	0.549178	-0.555452
YDR180W	1998.25	886	0.452713	-0.552684
YPL067C	2428	1295	0.53436	-0.55238
YNL010W	1695	1127.5	0.672413	-0.551803
YDR199W	2429.25	1291	0.53236	-0.551798
YNL147W	2000.12	1033.12	0.515186	-0.551638
YGL120C	1623.67	753	0.466167	-0.551597
YOR136W	1759.67	969.333	0.554266	-0.550383
YML130C	1973.75	1041.75	0.539284	-0.547973
YBR222C	1444.67	827.333	0.572755	-0.547882
YHR162W	1965	1264.5	0.652377	-0.546814
YIL028W	2396.5	1572	0.652384	-0.546758
YGR123C	1823.25	1210.75	0.669614	-0.545123
YBL026W	1798	838.5	0.467475	-0.544284
YNL100W	2115.75	1425.5	0.673436	-0.544255
YGR196C	2245.25	1470.75	0.652869	-0.543154
YPR194C	2988.75	1583	0.529362	-0.542816
YIL058W	1652	1076.5	0.653034	-0.541933
YML127W	1647.67	891.333	0.541265	-0.540759
YNL031C	2302	1558.75	0.673917	-0.540704
YOR137C	2196.75	1220.75	0.555803	-0.537762
YDR036C	2557.75	1354.75	0.530004	-0.537509
YGL022W	1666.62	853.562	0.491621	-0.536795
YPR156C	1910.25	1015	0.530185	-0.536007
YDR362C	2370	1081.75	0.456852	-0.535924
YJL047C	2246.12	1221.88	0.561295	-0.534687
YLR294C	1895.25	1236.25	0.65734	-0.533471
YAL005C	1933.25	1109	0.574512	-0.532464
YDL018C	2509.75	1397.25	0.553342	-0.530761
YOR254C	2363.5	1081.25	0.458217	-0.530398
YJR009C	2653.75	1458.25	0.549243	-0.530181
YDR110W	2661	1431.5	0.535216	-0.529455
YGL199C	1649.25	1099.25	0.672302	-0.529252
YMR273C	2067.5	1393.5	0.675502	-0.529017
YDR182W	1459.88	682.5	0.474942	-0.52896
YPL178W	2058.25	1106	0.537365	-0.526582
YOR002W	1804	1004.25	0.557248	-0.52591
YBL046W	2087.25	1201.5	0.575301	-0.525541
YOR092W	1778	991	0.5573	-0.525482
YLR181C	1630	1074	0.658917	-0.523158
YOR293W	1778.25	941.5	0.537841	-0.522495
YPR045C	2182.5	1153.25	0.53184	-0.522326
YOR005C	1859.5	1033.25	0.557688	-0.522295
YCL074W	2052.25	1121.75	0.55481	-0.522052
YMR281W	1500	816.25	0.546537	-0.521561
YLR195C	2441	1347.75	0.546609	-0.521299
YGL032C	2008	1301.5	0.673666	-0.521202
YDR051C	1841.25	989.25	0.536321	-0.520809
YBL074C	1557.75	717.25	0.460901	-0.519531
YIL149C	2515.75	1385	0.550601	-0.519373
YCR020C-A	2267	1258	0.555318	-0.51904
YNL156C	1871.25	1264.5	0.676861	-0.518985
YLR394W	1906.25	1256	0.659615	-0.518589
YGL152C	2110.5	1420.75	0.674134	-0.518437
YIL148W	2878.75	1584	0.550759	-0.518116
YJR099W	1730	957.75	0.550832	-0.517536
YDR453C	2565.25	1267	0.493663	-0.517367
YDL086W	2149.5	1196.25	0.555834	-0.515979
YJL172W	2480.75	1366.5	0.55106	-0.515717
YPL273W	2057.75	1096	0.532681	-0.515369
YLL003W	1930.12	963.25	0.500621	-0.515288
YOR234C	2278.75	1234.5	0.538725	-0.514908
YGL251C	1892.75	1274.75	0.674905	-0.513888
YOR289W	2465.5	1334.5	0.538942	-0.513036
YNL242W	1317	892	0.677727	-0.512603
YML028W	2273.12	1287	0.572381	-0.512129
YJL158C	2444.25	1360.75	0.55153	-0.511978
YBL075C	2043.75	1178	0.576864	-0.511825
YPL177C	2418.5	1303.5	0.539185	-0.510958
YFR026C	2102	1420.75	0.675472	-0.510539
YLR089C	1540.5	764.083	0.520225	-0.510513
YNR057C	1831.67	1024	0.559168	-0.510152
YPR168W	2247.75	1234.5	0.549713	-0.509998
YDL013W	2148.5	1197.25	0.556844	-0.509992
YPL014W	2700	1457.5	0.539351	-0.509532
YGR132C	2463.25	1667	0.675677	-0.50933
YJR141W	2661	1233.5	0.463464	-0.509151
YLR045C	2080.08	1023.56	0.498583	-0.508337
YFL013C	1756.12	919.875	0.519898	-0.50797
YFL001W	1637.38	805.875	0.501535	-0.507427
YMR033W	2053.75	951.75	0.4639	-0.507384
YGL104C	2299.25	1556.5	0.67609	-0.50689
YCR106W	1956.25	1083.5	0.55751	-0.506041
YPR063C	2228	1196	0.533874	-0.505502
YPL119C	2532.5	1369.25	0.539847	-0.505274
YOR022C	1981.75	1104.75	0.559849	-0.504559
YOR173W	2269	1269.75	0.559908	-0.504077
YOR226C	2243	1217.25	0.539996	-0.503994
YLR380W	1850.75	1223.25	0.661964	-0.503223
YKL146W	2838.75	1450.75	0.504742	-0.502733
YNL324W	2303.75	1566.75	0.679165	-0.501992
YKL069W	1940.5	956.625	0.512381	-0.500981
YDR447C	2198.75	1090.75	0.495912	-0.500245
YDR290W	2036	1090.5	0.534584	-0.499634
YPL106C	2275.75	1230.75	0.540506	-0.499613
YGR291C	2356.75	1259.75	0.53465	-0.499087
YOR007C	1628	911	0.560632	-0.498139
YPL183W-A	1614	835.75	0.540693	-0.498006
YCL042W	2026.75	1121.5	0.558896	-0.497821
YHL044W	2456	1627	0.659049	-0.497224
YGL041C	1789	1215.5	0.677763	-0.49701
YGR088W	2352.75	1592.75	0.677989	-0.495675
YDR091C	1674.33	936	0.553995	-0.494406
YNL299W	2110.5	1436.5	0.680234	-0.494101
YMR156C	2090.75	1395.5	0.668368	-0.49344
YMR075C-A	2004.5	1342.25	0.668466	-0.492761
YDR385W	2745	1481.25	0.540005	-0.491991
YAR020C	1747	1005	0.579136	-0.49188
YOL006C	2052	1151.75	0.56153	-0.49077
YDR536W	1549	769	0.49718	-0.490595
YDR297W	2180	1181.75	0.540303	-0.489658
YNL071W	1492	940.667	0.633048	-0.489237
YGL259W	2101	1426.75	0.679099	-0.489121
YGR037C	1968.5	1335	0.679157	-0.488784
YJL123C	2453.5	1360.25	0.554529	-0.488114
YDL243C	2796.25	1515	0.540572	-0.48755
YPR097W	1915	1026	0.53605	-0.487507
YFL007W	1780	954.75	0.536316	-0.485308
YOR041C	2356	1329	0.56221	-0.485188
YMR025W	1696.67	1126.67	0.669741	-0.483936
YBR262C	2545.75	1433.75	0.56124	-0.483918
YMR094W	2560	1198.5	0.469798	-0.483503
YGL216W	1582	1081	0.680054	-0.483484
YNL170W	1352	921.5	0.682215	-0.479487
YDL036C	2692.25	1512.5	0.562022	-0.479283
YJL017W	2145.75	1178.5	0.555985	-0.476529
YIL040W	2042.75	1335.88	0.651217	-0.476511
YNL297C	1968.25	1387.5	0.682688	-0.475998
YBR280C	2422.75	1365.5	0.562641	-0.475614
YDR479C	2336.75	1167.5	0.499151	-0.475597
YJL134W	1767.5	976.75	0.556168	-0.475077
YJR015W	1873	982.667	0.556177	-0.475007
YOR178C	2177	1225.75	0.563762	-0.472447
YJR046W	2168	1045.5	0.480351	-0.47234
YDR504C	2505.25	1252.5	0.499639	-0.471879
YLR266C	1714	1128.5	0.666767	-0.471809
YCL029C	1938.25	1093.75	0.563289	-0.471766
YGL001C	1919	1069.25	0.560283	-0.471508
YDR271C	2052.25	1094.25	0.538027	-0.471159
YPR058W	2352	1271	0.538204	-0.469694
YKL158W	2459.5	1255	0.509088	-0.469056
YBR149W	1937.75	1122.75	0.581881	-0.467792
YOR296W	2290	1246.25	0.544346	-0.466649
YGR031W	1756	1197.25	0.683211	-0.464847
YLL031C	1958.62	965.375	0.484098	-0.463329
YLR363C	1623.5	1087.75	0.668293	-0.461825
YGL065C	1642	933	0.563075	-0.461342
YPR123C	1614.67	871.333	0.539403	-0.459779
YPL103C	2577.5	1407	0.545391	-0.457672
YKL013C	1717	891.667	0.517227	-0.456786
YFR020W	2402.5	1645	0.684649	-0.456355
YIL067C	2084	1154.5	0.558557	-0.456063
YNL058C	1567	1070.25	0.685395	-0.45603
YDR435C	2444	1226.5	0.501728	-0.455983
YJL043W	2585.25	1446.75	0.55857	-0.455965
YOL041C	1260	713	0.565873	-0.455125
YDR088C	1925.75	994.25	0.517799	-0.454771
YPR043W	1993.75	1085.5	0.540068	-0.454276
YDL008W	1973	937	0.477091	-0.453971
YKR002W	1296	619	0.477623	-0.451815
YML023C	1840.81	951.062	0.519441	-0.450857
YMR199W	1664.33	1116.67	0.674601	-0.450311
YMR074C	1888.5	1020.25	0.540555	-0.450253
YEL005C	2155.75	1086.75	0.502516	-0.449982
YJL068C	1807.75	1000.75	0.559361	-0.449672
YAR043C	1611.75	941	0.584004	-0.449165
YGR209C	2344.75	1564.25	0.665553	-0.448892
YJR146W	2491	1276	0.511713	-0.448724
YNL091W	1794.62	1132.25	0.623246	-0.448722
YNL284C	2208.75	1219.25	0.540789	-0.448314
YIR020C	2620	1465.5	0.559567	-0.448026
YHR052W	1595.5	755	0.478636	-0.447715
YML074C	2281.25	1540	0.675101	-0.446853
YHL045W	2194.5	1465.25	0.665903	-0.446285
YKL222C	2074	1062	0.512054	-0.446078
YLR392C	2023.75	1358	0.670832	-0.445217
YBL061C	2250.5	1315.75	0.584497	-0.444839
YBR281C	2524.5	1435.25	0.567926	-0.44427
YDR535C	1944.75	968.25	0.503345	-0.443677
YGL062W	1627.25	1104.5	0.687113	-0.441809
YBR235W	2278	1287.25	0.568408	-0.441412
YHR058C	1855.04	958.083	0.518547	-0.441073
YOL013W-A	2200.25	1253.25	0.567793	-0.43937
YAR031W	1878.5	1089.5	0.585147	-0.439139
YLR118C	1681	1130	0.671776	-0.439038
YCL049C	2105.5	1197.25	0.568825	-0.438935
YDR063W	1812.75	981.5	0.546799	-0.438837
YDR019C	2746	1500.25	0.546894	-0.438092
YBL059W	1958.5	1139.75	0.585337	-0.437465
YER116C	2218.38	1188.5	0.532987	-0.436303
YGL181W	1513.33	1043	0.688093	-0.436023
YLL014W	3007	1543.25	0.513353	-0.436017
YDR514C	2550	1296	0.504426	-0.435451
YBR067C	2075.5	1219	0.585606	-0.435104
YDR075W	1650	911	0.547434	-0.433869
YDR083W	2416.75	1276.38	0.528743	-0.432832
YGR051C	2037	1403.75	0.68899	-0.430727
YOR367W	1936	1052.5	0.548542	-0.430627
YGL158W	2619.75	1804	0.689086	-0.430158
YNL319W	2241.5	1548	0.689059	-0.429001
YLR029C	2581.5	1472.75	0.572074	-0.428574
YJR033C	1673.25	939.75	0.5621	-0.427874
YDR122W	1974	1072.5	0.548253	-0.427464
YPR022C	2276.25	1237.25	0.543421	-0.426546
YGL124C	2123.75	1464	0.689706	-0.426497
YMR292W	1873	1298	0.689408	-0.426424
YFL034C-A	2704	1366.25	0.505637	-0.42623
YML096W	1647.5	1100.25	0.678149	-0.425761
YKL175W	1873.75	948.25	0.514711	-0.425495
YBR260C	1906.5	1063.25	0.571158	-0.425104
YDR402C	2218	1187.5	0.548592	-0.424808
YPL101W	1651.06	808.229	0.478604	-0.423574
YHR022C	2073.75	1379.25	0.668985	-0.423381
YOR307C	1901.25	1031.5	0.549484	-0.422537
YDL175C	2251	1290.25	0.571724	-0.421748
YJR092W	2401.5	1349.25	0.562874	-0.421717
YIL111W	1927	1069.75	0.544193	-0.420163
YLR426W	2149.75	1464.25	0.678973	-0.420061
YCR043C	2383.25	1372.25	0.57212	-0.419395
YCR002C	2117.89	1120.03	0.505177	-0.418901
YIR029W	2523	1422.75	0.56324	-0.418805
YBR018C	2283.5	1328.75	0.587493	-0.418548
YDR513W	2855.25	1446.5	0.506697	-0.418161
YDL161W	1833	1042.5	0.57239	-0.417796
YJL013C	1748.33	941.667	0.563454	-0.417103
YPL109C	2200.25	1214.5	0.550152	-0.416803
YOR051C	2395.75	1367	0.570644	-0.415975
YDR081C	1942.75	941.25	0.487262	-0.412787
YHR210C	2141	1444	0.670422	-0.412705
YFL034C-B	2279.96	1240.89	0.508361	-0.412002
YDR531W	2202.5	1270	0.576862	-0.41114
YEL063C	2638.75	1335.5	0.507713	-0.410428
YDR179C	1897.25	1040	0.55048	-0.410036
YDR537C	1795.5	899.25	0.507795	-0.409806
YBR066C	2083	1227.25	0.588569	-0.40911
YLR092W	1813.75	1222	0.67636	-0.409055
YCL016C	1609.17	912.333	0.567151	-0.408981
YER167W	2424.25	1226.75	0.507907	-0.40895
YER078C	2382	1214.33	0.507964	-0.408519
YLR298C	2048.38	1088.69	0.530545	-0.408315
YGR177C	1988.75	1336.75	0.671082	-0.407798
YLR115W	2706.8	1427.4	0.531305	-0.40719
YGR238C	2602	1749.25	0.671166	-0.407174
YGR281W	1590	1088.5	0.671167	-0.407166
YBR130C	1841.5	1076.5	0.588826	-0.40685
YOL114C	2757	1575.5	0.571834	-0.406204
YEL020C	2397.25	1222.25	0.50835	-0.405585
YJL001W	2559.75	1245.75	0.489238	-0.404785
YER135C	1605.75	817	0.508567	-0.403932
YBR258C	1917.5	1090.75	0.574838	-0.403278
YBL032W	1889.5	1102.75	0.589303	-0.402663
YMR189W	2399.75	1645.25	0.68153	-0.402367
YOL086C	2235.75	1232.25	0.546429	-0.401671
YOL105C	2253.5	1291.5	0.572407	-0.401503
YDL050C	2454.25	1412	0.575164	-0.401344
YDL165W	1889.75	925	0.490127	-0.401184
YNL253W	1888.25	1308	0.692899	-0.400666
YBR278W	2378.75	1370.75	0.575298	-0.40055
YGR146C	2083	1446	0.694162	-0.400187
YLR407W	1827	1216.25	0.677837	-0.399391
YMR179W	1959.75	1342	0.682011	-0.399037
YKL094W	2080.75	1073.25	0.518163	-0.398749
YER128W	2489.5	1267.5	0.509274	-0.39855
YHR001W-A	2150.25	1442.75	0.672818	-0.394895
YER106W	2591	1319.5	0.509874	-0.393984
YLR023C	2098.5	1428.5	0.678666	-0.39397
YFL038C	1638.5	948.5	0.581692	-0.393552
YCR022C	2332.75	1344.75	0.576591	-0.392882
YDR066C	1620.75	895	0.552698	-0.392687
YKL015W	2532.5	1314.75	0.519095	-0.391522
YEL041W	2401.75	1225	0.51022	-0.39135
YPL186C	1764.33	968.333	0.553163	-0.39095
YNL051W	1977	1374	0.694226	-0.39088
YKL140W	2370.5	1221.5	0.51925	-0.39032
YDR170C	1607	783.25	0.492885	-0.390018
YER018C	2748.75	1370.5	0.495165	-0.389567
YLR013W	1628.75	1100	0.679399	-0.389173
YBR148W	2063.5	1213.25	0.590877	-0.388855
YOR183W	1911.25	1088.5	0.574058	-0.387958
YIR038C	1913.5	1056.5	0.567243	-0.386954
YMR073C	1829	1246.5	0.683763	-0.386912
YMR034C	1717.25	1168.25	0.683946	-0.38565
YER161C	2059.62	1135.5	0.575471	-0.385087
YBR287W	2123.5	1225.25	0.577937	-0.384901
YOR167C	2300.25	1325	0.574459	-0.384665
YHR206W	2010	1325.5	0.674242	-0.384317
YNR053C	1768.25	1031.75	0.584328	-0.383952
YGR235C	2394.5	1620.25	0.674453	-0.382746
YIR011C	2159.25	1066.5	0.496445	-0.382414
YJL073W	1498.5	854.75	0.567878	-0.381897
YJR034W	1966.5	1078	0.548823	-0.381874
YOR142W	2224	1293.75	0.574997	-0.38025
YCL048W	2302	1340.25	0.578748	-0.38009
YDR052C	1600.42	894.694	0.562504	-0.379785
YGL115W	2424	1203.25	0.495413	-0.379782
YHL019C	2297.5	1562	0.674889	-0.379506
YIL084C	2240.12	1043.25	0.491023	-0.378427
YDL014W	1977	984	0.497242	-0.377958
YOR082C	1491.5	851.5	0.575385	-0.377066
YBL097W	2400.75	1390.62	0.552858	-0.376555
YHR142W	1925.75	1299	0.675332	-0.376214
YKL045W	1963.5	1059.5	0.540193	-0.375877
YFR054C	1615.75	1110.75	0.698292	-0.375807
YJL036W	2214.5	1259.25	0.568691	-0.37543
YNL014W	2260.25	1240.25	0.549741	-0.374278
YMR322C	1495.5	1040.25	0.696503	-0.374083
YEL010W	2769	1421.75	0.512532	-0.373757
YBR263W	2578.25	1495.25	0.57992	-0.373142
YPL063W	1841	915.5	0.497066	-0.373087
YER066C-A	2496.75	1279.75	0.512621	-0.373075
YLR345W	1846.25	1257	0.681953	-0.372466
YDL085W	2132.25	1240.75	0.580051	-0.372365
YFL048C	2408.25	1238.25	0.512775	-0.371901
YJR134C	2091.75	1082.25	0.521794	-0.370611
YOR248W	2037.5	1119.5	0.55022	-0.37032
YML065W	3348.25	1667.75	0.497757	-0.370289
YEL048C	2596.25	1330.75	0.512988	-0.370282
YDL109C	2125.25	1232.5	0.580427	-0.370135
YKL183W	2403.25	1253	0.521881	-0.369942
YNL120C	1425.33	991	0.697085	-0.36979
YLR127C	2133	1156	0.542538	-0.367617
YJL141C	2452.5	1398.5	0.569732	-0.367151
YKL129C	2424.75	1267.5	0.522427	-0.365708
YJL077C	1483.67	842.333	0.569932	-0.365559
YKR061W	1696	886.5	0.522492	-0.365201
YML116W	2415	1657	0.687014	-0.364421
YNL012W	1483.5	1028.75	0.697944	-0.363449
YHL017W	2203.5	1502.75	0.677239	-0.362038
YJL002C	2124.75	1063.75	0.499795	-0.362037
YDL025C	2144.5	1246.25	0.581911	-0.361331
YNL009W	1853	1291.5	0.698265	-0.361084
YFR051C	2521.75	1373.25	0.544549	-0.360533
YAL029C	2106.5	1250	0.594185	-0.359826
YOL135C	1724.25	874.125	0.522735	-0.359761
YOR269W	2404	1339.75	0.55686	-0.359211
YMR222C	1703.25	1154	0.687825	-0.358808
YOR209C	2172	1209.25	0.557028	-0.357769
YGR042W	1758	1232.75	0.701423	-0.357318
YBL055C	1695.25	987	0.594677	-0.355509
YBR155W	2007.5	1004	0.501292	-0.355333
YBR042C	2016.5	1199	0.59473	-0.35504
YOL084W	2049	1184	0.578089	-0.354872
YGL203C	1742.75	1228.5	0.701871	-0.354674
YJR097W	1462.33	850	0.57139	-0.353956
YPL158C	2265.75	1250	0.552218	-0.353795
YHR049W	2038	1380.25	0.678437	-0.353134
YOL087C	2322	1344.5	0.578309	-0.353071
YDL082W	1577	915.75	0.583309	-0.353044
YHR164C	2453.25	1455.75	0.5932	-0.351648
YKR026C	2564	1340.75	0.524277	-0.351377
YBR234C	2484	1253	0.502044	-0.35113
YGR226C	2167.25	1470.25	0.678786	-0.350546
YBR293W	2327	1357.75	0.583776	-0.350273
YPR032W	1829.5	1011.5	0.552648	-0.350238
YKL044W	2411.75	1262.5	0.524547	-0.349282
YLR366W	1705.5	1167.75	0.685518	-0.349143
YKL097C	2486	1303	0.524615	-0.34876
YDR527W	2395.25	1202	0.502519	-0.348477
YER089C	1783.5	969.75	0.552936	-0.34786
YGR168C	1874.5	1269.25	0.679148	-0.347852
YCL036W	2280.75	1332	0.584227	-0.347596
YLR189C	1426.67	972	0.685849	-0.346978
YDR311W	2036.25	1116.75	0.548564	-0.346386
YLR344W	1938	1329.25	0.685958	-0.346267
YML106W	1794	1228.5	0.689676	-0.346004
YGR099W	1831.12	974.875	0.551513	-0.342736
YKL156W	1990.5	1044.5	0.525407	-0.342622
YBR197C	2207.75	1314.25	0.596181	-0.34231
YAL014C	1881.25	1124.25	0.596194	-0.342194
YBR299W	2612.25	1448.5	0.553664	-0.341836
YGR243W	2505.5	1701.75	0.680027	-0.341319
YLR281C	2513.5	1725.75	0.686777	-0.340912
YGL176C	1872.25	1301.25	0.704221	-0.340796
YOL042W	1512	875.5	0.579834	-0.340549
YDL095W	1948	1139.5	0.585445	-0.340373
YLL005C	2182.75	1147.75	0.525768	-0.339821
YMR276W	1921	1344	0.701367	-0.338198
YCR001W	2233	1310	0.586148	-0.336204
YHR039C	1384.67	948.667	0.68072	-0.336172
YGL250W	1621	1132	0.70507	-0.335784
YIL017C	2380.25	1617	0.680831	-0.335344
YNL167C	2146.75	1515.75	0.701762	-0.335287
YDL027C	2181.75	1281	0.586493	-0.334157
YBR218C	1866.5	1111.75	0.597195	-0.333411
YBR162W-A	1862.25	1107	0.597203	-0.333338
YLR284C	2134.25	1467	0.687999	-0.332919
YCL013W	2022	1171.5	0.586869	-0.331931
YOR204W	1699	894.75	0.531951	-0.331646
YPL228W	2096.33	1136.17	0.541994	-0.331483
YDR095C	1897.25	1062.5	0.560619	-0.330713
YHR009C	2419.25	1641.25	0.681504	-0.330345
YLR287C-A	1795.5	1237	0.688449	-0.329974
YFL051C	2475	1260.5	0.518304	-0.329824
YDR257C	2352.25	1317.75	0.560874	-0.328721
YGR091W	1970.12	1011	0.506263	-0.327555
YLR128W	2155.75	1486.75	0.688847	-0.327366
YEL008W	2456	1274	0.518636	-0.327299
YGR156W	1763.38	945.75	0.548415	-0.327137
YPL081W	1971	1102.25	0.560709	-0.326165
YJL055W	2576.75	1484.75	0.57492	-0.325865
YPL211W	1810.25	933.75	0.508831	-0.325447
YNL309W	2258	1586.5	0.703099	-0.32542
YER073W	2455.5	1277.25	0.518914	-0.325183
YDR146C	2836.5	1590.75	0.56134	-0.325071
YDR506C	2398.5	1243.75	0.518963	-0.324807
YML117W	2315.25	1602.5	0.692773	-0.324568
YKR047W	2331.75	1229	0.527845	-0.323733
YLR400W	1982.75	1338.25	0.689423	-0.323598
YPL062W	2245.5	1257.5	0.561033	-0.323388
YLR081W	1824.5	1260	0.689466	-0.323322
YDR251W	2422.25	1357.5	0.56165	-0.322647
YHR199C	2174.25	1488.25	0.682555	-0.322528
YLR084C	1593.67	1098.33	0.689669	-0.321995
YGR137W	2343.75	1656	0.707485	-0.321527
YLR040C	2105	1446.25	0.690075	-0.319336
YPL246C	3059.25	1717.75	0.561548	-0.318964
YDR391C	2648	1490.5	0.562129	-0.318903
YDR474C	2737	1425.75	0.519855	-0.318014
YLL051C	2012.75	1391.25	0.690338	-0.317613
YLR395C	1755.25	1196.5	0.690381	-0.317335
YPR052C	2216.75	1240.5	0.556651	-0.317138
YPR155C	1907.25	1070.75	0.556692	-0.316798
YJL100W	2349	1335.5	0.576191	-0.315751
YDR261C	2921.5	1647.75	0.562557	-0.315555
YOL013C	2258	1315.5	0.582894	-0.315442
YLL028W	3043.25	1614.5	0.529033	-0.314527
YDR218C	1889.5	1050	0.562712	-0.314338
YMR119W-A	2270.25	1564.25	0.694257	-0.314303
YIL021W	1896.25	969.5	0.511837	-0.313274
YFL003C	2302	1283.25	0.557156	-0.312956
YKL032C	1938.25	996.75	0.531266	-0.311878
YDR070C	1595	910.75	0.563082	-0.311447
YDR436W	2564	1335.25	0.520862	-0.310352
YML019W	2372.25	1658.75	0.694876	-0.310019
YPL053C	2238.25	1255.5	0.562594	-0.309988
YFR024C-A	1613	1137.75	0.709561	-0.309267
YNR011C	1358	760	0.559647	-0.307344
YBR077C	2697.75	1623.25	0.600168	-0.307318
YGL080W	2138	1517	0.709968	-0.306865
YKL089W	1573.5	783.75	0.513542	-0.30637
YLR387C	2304.25	1596	0.69207	-0.306283
YDR395W	2753.25	1549.75	0.563822	-0.305658
YMR123W	2285.38	1354.62	0.598747	-0.304834
YJL183W	2242	1284.25	0.577665	-0.304023
YPL086C	1745.25	986	0.563299	-0.303932
YBR184W	1582.75	923.5	0.600656	-0.303039
YDR125C	2738.75	1545	0.564165	-0.302975
YOR093C	1828.25	1067.75	0.584429	-0.302839
YNL115C	1632.75	1154.5	0.706236	-0.302276
YOR386W	2458.25	1385.5	0.563506	-0.30216
YPR015C	1991.75	1121.25	0.558535	-0.301556
YIL131C	2318.5	1296	0.558556	-0.301384
YDL051W	2072	1224.75	0.59209	-0.300965
YKL198C	2429.5	1291	0.53087	-0.300289
YHR151C	2011.25	1382.75	0.685619	-0.299761
YDR378C	1888.92	1063.96	0.544141	-0.29968
YDR172W	1926.75	990	0.511339	-0.299194
YJR112W	2317.88	1296.31	0.567933	-0.297011
YLR289W	1751.5	1192.75	0.693568	-0.296489
YDR221W	2396.25	1345.5	0.565099	-0.295667
YGR129W	2633.75	1878	0.711893	-0.295504
YKL162C	1934.5	1025.25	0.531635	-0.294366
YDR202C	2301.75	1298.25	0.565283	-0.294228
YER121W	2133.25	1103	0.523018	-0.293945
YBR090C	2201.5	1326.5	0.601706	-0.293823
YOR049C	2196.75	1286	0.585558	-0.293577
YHR029C	1315.33	904.333	0.686597	-0.292492
YKL076C	2446.75	1272	0.531887	-0.292413
YFR009W	1580.75	827.25	0.523241	-0.292243
YOL028C	1725.25	1008.25	0.585844	-0.291231
YPL182C	2191.75	1240.75	0.56482	-0.290872
YGL130W	1603.67	972.083	0.55696	-0.29054
YKL023W	2678.25	1425	0.532331	-0.288973
YJR010C-A	2374	1373.5	0.579651	-0.288224
YDR240C	2111.25	1084.75	0.513335	-0.288039
YDR383C	2409.5	1353.25	0.566136	-0.287556
YDR278C	2131	1196.75	0.566297	-0.286291
YKL103C	2640.5	1406	0.532755	-0.28569
YKL098W	2766.25	1470.75	0.532756	-0.285683
YBL066C	2100.5	1261	0.602945	-0.282956
YHL013C	2164	1490	0.687904	-0.282776
YOR075W	2300.5	1198.5	0.519813	-0.280979
YKL179C	2390.25	1275.5	0.533411	-0.280604
YNR066C	1940.5	1138.75	0.587259	-0.279619
YPL023C	1865.25	1045.5	0.566177	-0.279223
YLR324W	1630.5	1133.25	0.696282	-0.278733
YOL065C	2217	1304.75	0.587413	-0.278353
YPR062W	2466.75	1390.25	0.56136	-0.27819
YDR262W	2959.25	1679.5	0.567402	-0.277646
YLR005W	2156.5	1177.38	0.539781	-0.277323
YLR183C	1644	1142.75	0.696768	-0.275556
YMR253C	2241.5	1592.75	0.709982	-0.274643
YPL137C	2316.25	1311.25	0.566911	-0.272921
YGR241C	2194.5	1518.25	0.689253	-0.272756
YNL171C	1900.25	1351	0.710269	-0.272525
YAL027W	1969.25	1189.5	0.604157	-0.27232
YGL141W	2268	1625	0.715978	-0.271379
YEL030W	2411.5	1264.25	0.52601	-0.271173
YKL164C	1720.5	916.75	0.534798	-0.269861
YDR147W	2723	1540.75	0.568421	-0.269676
YHR189W	1795.5	1098.38	0.581243	-0.26898
YML081C-A	1832.25	1274.38	0.705461	-0.268675
YBL031W	1849	1118	0.604651	-0.26798
YHL020C	2255.75	1556.75	0.689981	-0.267346
YJL207C	2086.25	1214	0.582291	-0.267216
YJR044C	2555	1436.75	0.562691	-0.267183
YOR328W	2037	1158.5	0.56764	-0.266666
YNL238W	1426	1004.5	0.711076	-0.266568
YGL092W	1754.5	922.5	0.523403	-0.266438
YFR036W	2224.67	1160.33	0.523412	-0.266402
YPL008W	2443.5	1390	0.567743	-0.265782
YLL042C	2155.75	1151.25	0.535463	-0.264704
YKL159C	2052.5	1076.25	0.535486	-0.264528
YGL157W	2266.75	1625.5	0.717148	-0.264474
YGL091C	1760.75	1086.25	0.617295	-0.26391
YMR213W	2510.75	1314.25	0.524053	-0.263809
YBL024W	2184.75	1321.75	0.605218	-0.263005
YKL037W	2815.5	1506.25	0.535702	-0.262855
YMR079W	1997	1042	0.518013	-0.261903
YAL025C	2051	1074.75	0.524547	-0.261806
YFR038W	1993.5	1433	0.717827	-0.260466
YKL021C	2045.12	1233.25	0.60006	-0.260111
YNL117W	2116	1495.5	0.711958	-0.260065
YBR181C	1717.25	1040.75	0.605572	-0.259896
YDL003W	1974.04	1093.96	0.538231	-0.259514
YBR060C	1938.71	1139.71	0.57931	-0.259343
YOL136C	1805.25	1049.5	0.589764	-0.259058
YOL015W	2533.5	1490.5	0.589771	-0.259004
YIL170W	1934.5	1146.5	0.58335	-0.258789
YKR053C	2167.25	1167.75	0.536305	-0.258185
YNL216W	1857.88	1070.62	0.569783	-0.258085
YOR135C	1762	1043	0.589921	-0.257771
YJL090C	2289.25	1204.5	0.525939	-0.256171
YFR048W	2203.75	1585.5	0.718569	-0.256083
YKL173W	2190.62	1307	0.602267	-0.255807
YGR161C	1556.5	1116.25	0.719003	-0.253523
YOR011W	2207.75	1304	0.590584	-0.252334
YOR038C	2030.5	1198.5	0.590592	-0.252262
YBL037W	2160.25	1303	0.60657	-0.251138
YIR020W-B	2046	1177.25	0.584418	-0.250292
YOR385W	2394	1363.25	0.569651	-0.249399
YDL218W	2177.25	1248	0.571062	-0.249013
YPL233W	2535	1460.5	0.576294	-0.248697
YDR338C	1844.67	1047	0.571239	-0.247627
YKL053W	2093.75	1117	0.537758	-0.246922
YPL113C	2130.25	1215.25	0.570033	-0.246122
YOL045W	2006	1182	0.591434	-0.245354
YBR215W	1782	1080.5	0.60727	-0.244996
YGL253W	2427.5	1749.5	0.720462	-0.244906
YDR148C	2797.5	1594.5	0.571727	-0.24381
YIL143C	1917	1107	0.577772	-0.243488
YBR144C	2144.25	1301.75	0.607493	-0.243039
YGL013C	2273.25	1634.75	0.720811	-0.242848
YIL065C	1892	1096.75	0.585418	-0.242337
YML037C	1494	1049.5	0.704689	-0.24212
YPL214C	2148	1224.75	0.570524	-0.241905
YGL002W	2292.5	1652.5	0.720989	-0.241798
YDR475C	2619.75	1391.25	0.529922	-0.241393
YKR039W	2557.75	1360	0.538488	-0.241266
YNL057W	1651	1174.5	0.714575	-0.240759
YGR017W	2195.25	1582.25	0.721193	-0.240592
YBR113W	1746.25	1043	0.607826	-0.240124
YOL079W	2020	1196.25	0.592176	-0.239266
YHR152W	2059.25	1433.5	0.693796	-0.238989
YPR012W	1980.75	1121	0.566142	-0.238645
YBL053W	2028.25	1209.75	0.608023	-0.23839
YDR387C	2868.5	1640.75	0.572444	-0.2382
YHR180W	1698	1175.75	0.694006	-0.237431
YMR100W	2347.12	1546.25	0.658934	-0.236311
YJR060W	2469	1448	0.586248	-0.235728
YGR124W	2118.75	1526.75	0.722036	-0.235614
YDR273W	2658.75	1514.75	0.572802	-0.2354
YDR398W	1471	852.333	0.58011	-0.235252
YGR016W	2266.5	1635.75	0.722194	-0.234681
YNR024W	1904	1131.75	0.5928	-0.234149
YMR326C	1462	1044.75	0.715617	-0.233067
YOR161C	2102.5	1242.5	0.593001	-0.232493
YBR174C	1255	764	0.608765	-0.231881
YLR299W	1499.75	1045.5	0.703497	-0.231538
YHR185C	1727.25	1195	0.694868	-0.231025
YLR214W	1755	1229.25	0.703654	-0.230506
YHR101C	2079.5	1091.75	0.523653	-0.230385
YCL026C	2296.5	1378.75	0.603999	-0.230343
YPL162C	2072.75	1185	0.57188	-0.230269
YDR466W	1901.75	1023.25	0.531386	-0.230257
YGR284C	1579.67	1096.67	0.69506	-0.229598
YNL262W	2653.75	1426.25	0.532528	-0.229492
YAL004W	1942	1175.25	0.60912	-0.228766
YOR071C	2268	1361.25	0.593579	-0.227753
YDR222W	2449.75	1404.75	0.573871	-0.227039
YDR112W	2889.75	1659.25	0.57397	-0.226267
YBL070C	2083.75	1261	0.609466	-0.225726
YJL214W	2310.5	1358.5	0.587558	-0.225305
YHR007C	2086	1098	0.524729	-0.224373
YPR031W	1937.25	1097	0.56788	-0.224272
YJR038C	2594.5	1524.75	0.587843	-0.223039
YBL083C	1336.33	814.333	0.609773	-0.223031
YMR006C	2425.25	1718.5	0.707495	-0.222704
YOR192C	1703.75	1009	0.594207	-0.2226
YNL218W	2293.25	1657.5	0.717084	-0.222248
YER119C-A	1668.25	877.5	0.532516	-0.221653
YIR001C	1983.25	1163.75	0.588057	-0.221337
YDR528W	2019	1071.75	0.532602	-0.221
YMR039C	2031	1423.25	0.707792	-0.220652
YBR013C	1404.5	854.25	0.610046	-0.220638
YMR200W	2495.25	1338.5	0.534858	-0.220056
YER163C	2123.75	1143.75	0.53274	-0.219947
YOR306C	2127.88	1189.75	0.569351	-0.219602
YNL192W	1721.25	1238.75	0.717458	-0.219491
YGR001C	2457.75	1789.25	0.724846	-0.219025
YIL105C	2535.75	1494.25	0.588395	-0.21865
YMR130W	1644.75	1166.25	0.708226	-0.217648
YDL119C	1943.25	1182.5	0.606219	-0.217173
YPL120W	2341.62	1348	0.573544	-0.217143
YDR325W	1946.5	1128.25	0.585458	-0.21641
YIR035C	1950.25	1116.25	0.588804	-0.215392
YOR186W	2201	1317.5	0.595093	-0.215331
YNL281W	2128	1530	0.718058	-0.215061
YCL032W	2482.25	1512.5	0.6102	-0.214842
YFR027W	1839	1079.75	0.585995	-0.214521
YJL132W	1918.5	1115.25	0.588949	-0.214238
YKL157W	2230	1210	0.54199	-0.214138
YBR231C	2122	1287.25	0.606837	-0.213509
YBR031W	2576.75	1591.25	0.610872	-0.21339
YBL067C	1785.33	1095.67	0.610939	-0.212802
YGR126W	2314.75	1682.75	0.72604	-0.211976
YOL047C	1829.75	1090.5	0.59573	-0.210104
YCR102C	2194	1332.75	0.607477	-0.209713
YKR001C	2693	1465.25	0.542599	-0.209418
YER064C	2483	1323.5	0.534149	-0.209223
YHR167W	1743	1218	0.69792	-0.208342
YLR450W	2277.75	1615.25	0.709577	-0.208298
YOR080W	1619.25	951.5	0.595963	-0.208186
YLR107W	1579	1110.5	0.707157	-0.207594
YML100W	2168	1538.5	0.709739	-0.207176
YJL116C	1979.25	1184.75	0.589844	-0.207115
YAL042W	2053	1254.25	0.611693	-0.206188
YDR344C	1759	1010.75	0.576569	-0.205932
YIL145C	3074	1814	0.590111	-0.204996
YPR055W	2098.75	1115.71	0.488983	-0.204789
YPL168W	1894.25	1089	0.574947	-0.203932
YDL089W	1892.25	1146.25	0.608487	-0.203727
YGR021W	1906.75	1378.5	0.727638	-0.20254
YGR140W	2101	1219.19	0.575116	-0.202426
YLR271W	1988.25	1404.5	0.707972	-0.202264
YGL242C	2204.5	1606.5	0.727793	-0.201625
YGR277C	2836	1493.75	0.528874	-0.201212
YDR329C	2585.75	1489.5	0.577204	-0.200965
YJL201W	2023.25	1192.5	0.590683	-0.200444
YDR371W	2644.75	1528.5	0.577292	-0.200271
YOR229W	2441.75	1405.25	0.575506	-0.199133
YOR126C	2245.5	1341	0.597114	-0.198739
YBR058C-A	1584.5	998.5	0.635363	-0.198119
YOL104C	2205.75	1319	0.597192	-0.198104
YOR376W	2432.75	1399.75	0.575635	-0.198029
YAR023C	1872	1136.75	0.612646	-0.19782
YNL228W	1653.5	1183.25	0.720491	-0.19711
YDR416W	2572.75	1519	0.590972	-0.196986
YHR126C	1846.25	1288.75	0.699454	-0.196939
YNL329C	2297.5	1656.25	0.720621	-0.196152
YBR226C	2023.75	1231.25	0.609884	-0.195441
YCL011C	1684.75	1001.75	0.610015	-0.194666
YBR100W	1732.5	1049	0.613025	-0.194501
YOR351C	2109.75	1210.75	0.576154	-0.193571
YLR121C	1481.25	1050	0.709628	-0.191428
[truncated: 2,850 more rows]
